# Supplementary material
Source: Royal Society of Chemistry journal article supplement (doi:10.1039/d6nj00261g)
Supplement: d6nj00261g1.pdf [file d6nj00261g1.pdf]

## Supporting Information for

# Unveiling the catalytic potency of copper-integrated $[P_6Mo_{18}O_{73}]^{n-}$ -based complex: structural basis and enhanced performance in selective oxidation of aromatic alcohol

Xiao-Yan Zhang†, Yan-Rui Dou†, Na Xu, Hui Tan, and Xiu-Li Wang\*

*College of Chemistry, Bohai University, Liaoning Professional Technology Innovation Center of Liaoning Province for Conversion Materials of Solar Cell, Jinzhou 121013, P. R. China.*

### 1. Materials and general methods.

All chemicals were commercially purchased without further purification. Sodium molybdate dihydrate ( $\geq 99.0\%$ ), Phosphoric acid ( $\geq 85.0\%$ ), Copper(II) chloride dihydrate ( $\geq 99.0\%$ ), Strontium chloride hexahydrate ( $\geq 99.0\%$ ), Sodium hydroxide ( $\geq 96.0\%$ ), Hydrochloric acid ( $\geq 36.0\text{--}38.0\%$ ), Benzimidazole ( $\geq 99.0\%$ ), Ethanol ( $\geq 99.7\%$ ), Acetonitrile ( $\geq 99.0\%$ ), Ethyl acetate ( $\geq 99.5\%$ ), Cyclohexane ( $\geq 99.5\%$ ), tert-Butyl hydroperoxide ( $\geq 70\%$ ), All catalytic reaction substrates were purchased from Shanghai Aladdin Biochemical Technology Co., Ltd., with a purity of  $\geq 97.0\%$ . The powder X-ray diffraction (PXRD) patterns were measured using a D/teX Ultra diffractometer. Fourier transform infrared spectra (FT-IR) were conducted on a Varian 640 FTIR spectrophotometer using KBr pellets in  $400 - 4000\text{ cm}^{-1}$ . X-ray photoelectron spectrum (XPS) was measured using a Thermomo Scientific K-Alpha photo-electron spectrometer. The Raman spectroscopy was measured using a high-resolution confocal micro Raman spectrometer. The catalytic reaction was analyzed using a Shimadzu gas chromatograph (GC) GC-2010 Pro with a flame ionization detector equipped with a TM-5 Sil capillary column.

### 2. X-ray crystallography.

The crystallographic data of the complex were acquired using a Bruker D8 QUEST diffractometer equipped with a Bruker APEX-II CCD detector and graphite-

monochromated Mo K $\alpha$  radiation ( $\lambda = 0.71073 \text{ \AA}$ ) at 296.15 K. Absorption corrections were applied using the multi-scan program SADABS. The structure was solved by direct methods using the ShelXT program with intrinsic phasing and refined by full-matrix least-squares methods on  $F^2$  using the ShelXL 2018/3 program.[1,2] All non-hydrogen atoms were refined anisotropically, while hydrogen atoms were refined isotropically. The guest water molecules are severely disordered and therefore removed using the “Solvent Mask” program in the Olex2 software package. The crystallographic data for complexes **1** and **2** can be obtained free of charge from the Cambridge Crystallographic Data Centre via <https://www.ccdc.cam.ac.uk/structures/>. (CCDC numbers: 2474578 and 2474579)

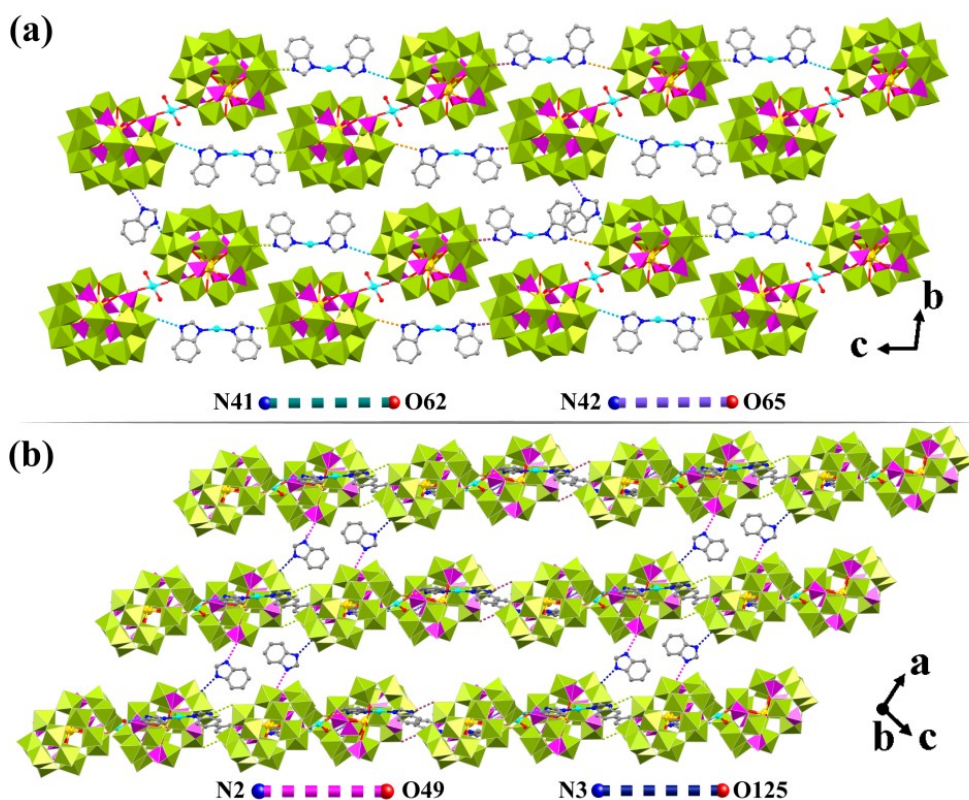

Fig. S1 (a) The 2D supramolecular layered structure of complex **1**, (b) the 3D supramolecular framework structure of complex **1**.

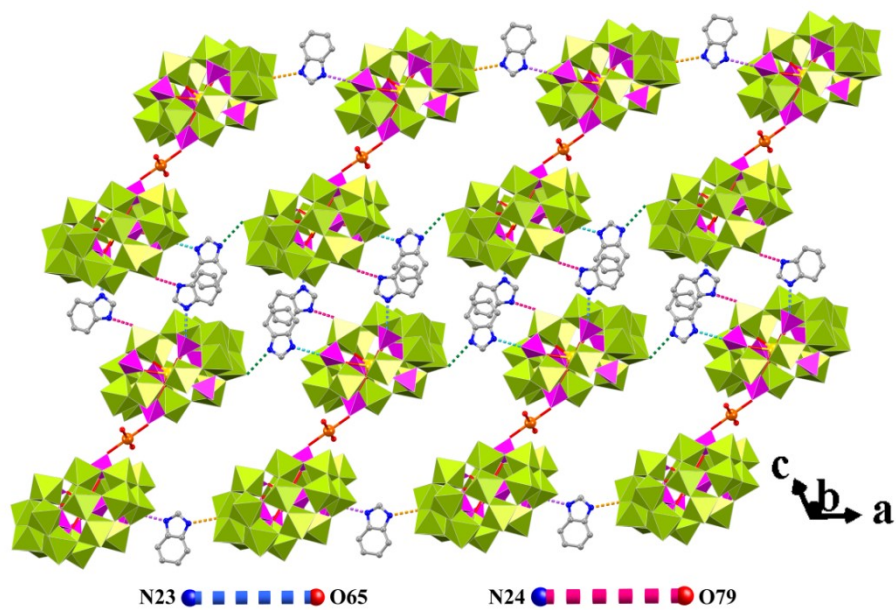

Fig. S2 The 2D supramolecular layered structure of complex 2.

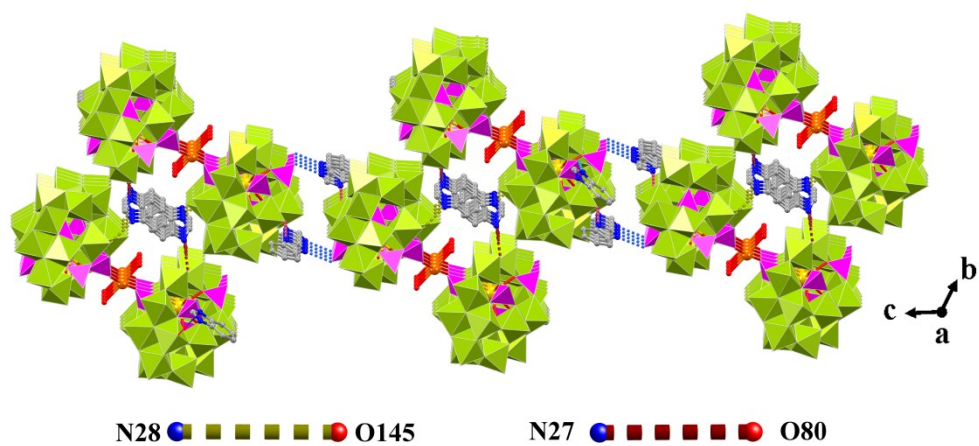

Fig. S3 The 3D supramolecular framework structure of complex 2.

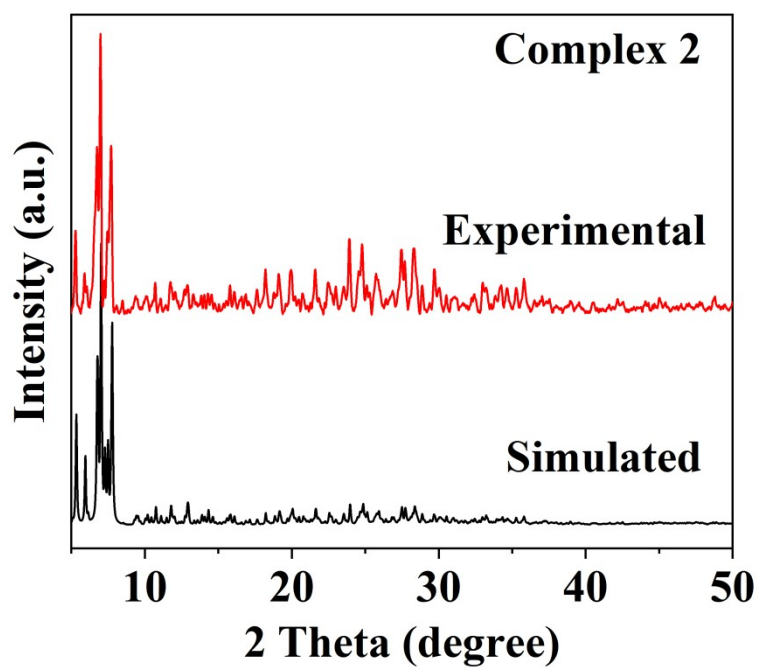

Fig. S4 The PXRD patterns of complex 2.

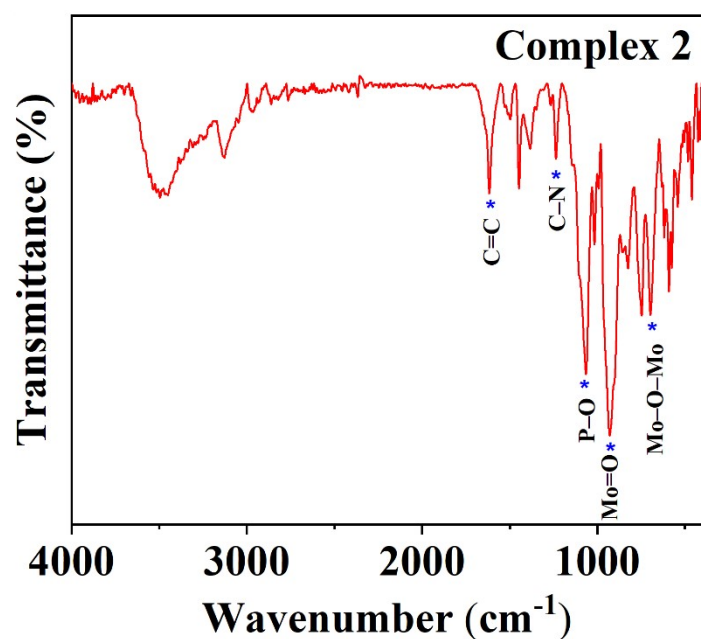

Fig. S5 The FT-IR spectrum of complex 2.

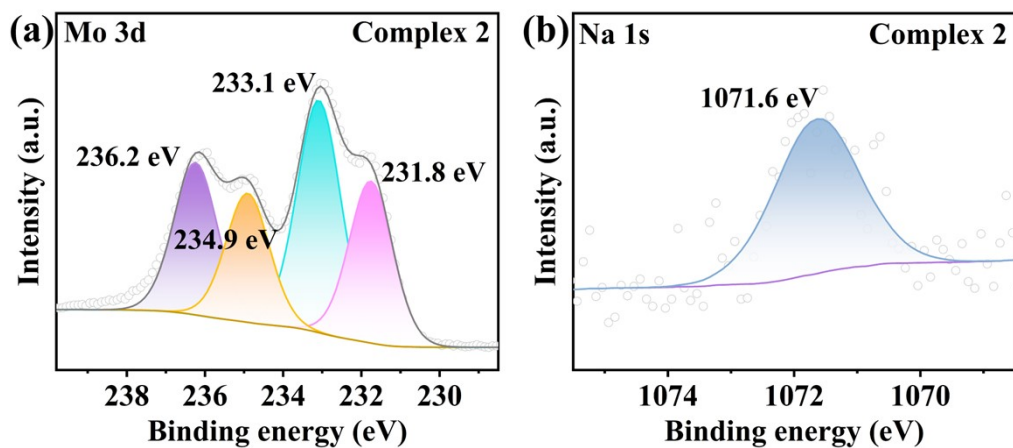

Fig. S6 XPS spectra of (a) Mo 3d and (b) Na 1s in complex 2.

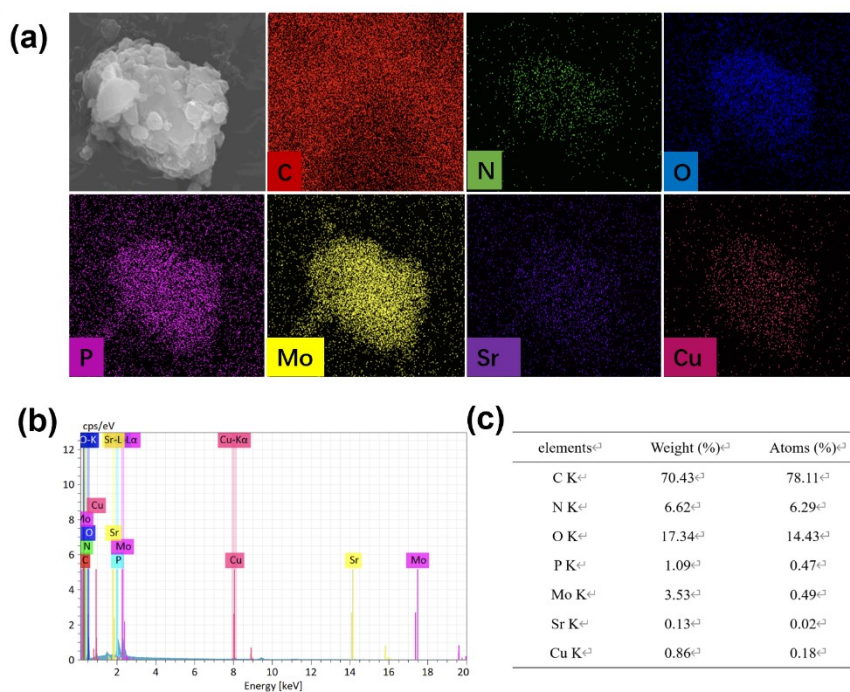

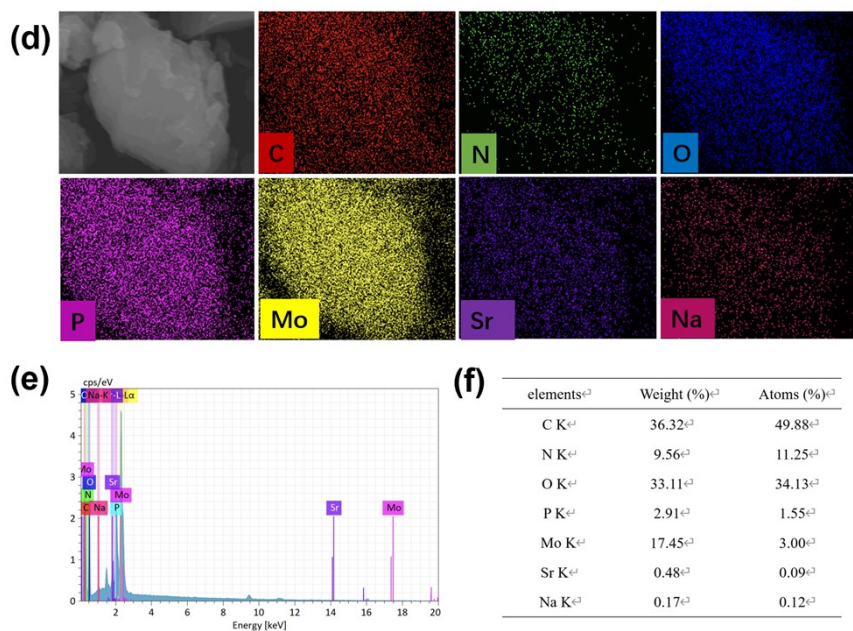

Fig. S7 SEM-EDS characterization of the complex 1: (a) elemental mapping, (b) spectrum, and (c) quantitative data. SEM-EDS characterization of the complex 2: (d) elemental mapping, (e) spectrum, and (f) quantitative data.

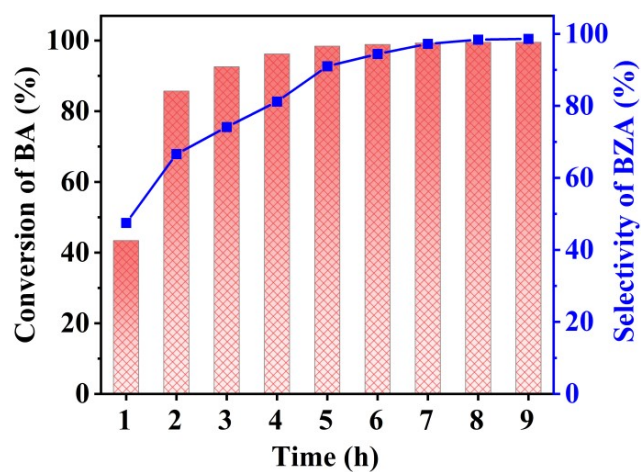

Fig. S8 The change of BA catalytic oxidation over time for complex 1.

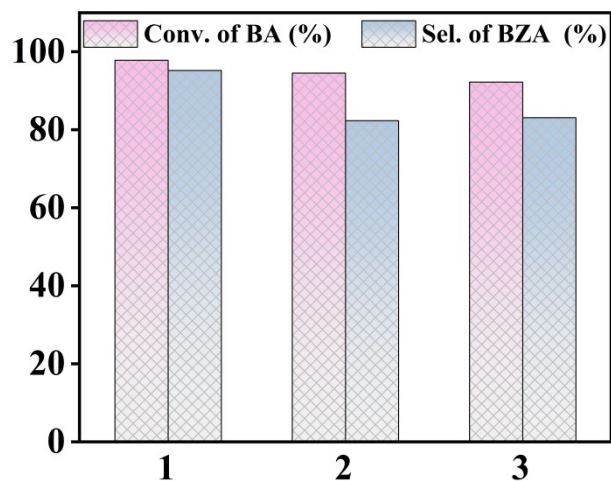

Fig. S9 Cyclic experiment of complex 1 as a catalyst.

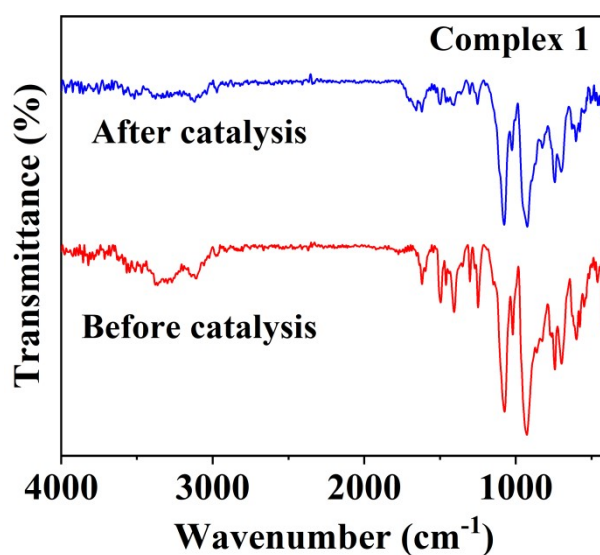

Fig. S10 IR spectra of complex 1 before and after catalyzing the reaction.

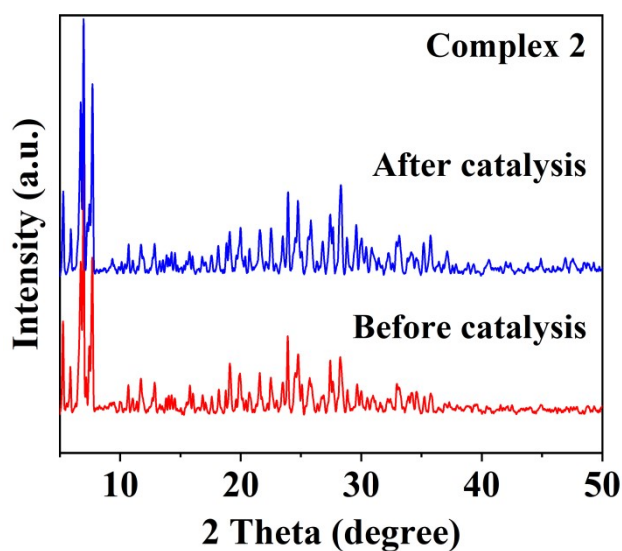

Fig. S11 PXRD patterns of complex 2 before and after catalyzing the reaction.

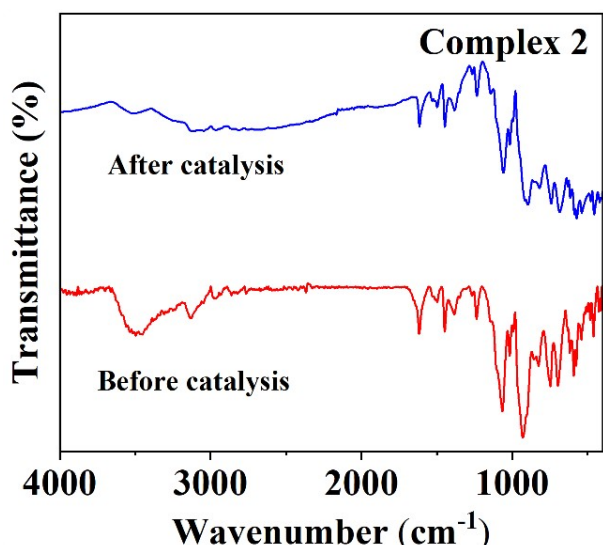

Fig. S12 FT-IR spectra of complex 2 before and after the catalytic reaction.

Table S1. Crystal data and structure refinement for complexes 1 and 2.

| Crystal Data                              | Complex 1                                                                                                                           | Complex 2                                                                                                                           |
|-------------------------------------------|-------------------------------------------------------------------------------------------------------------------------------------|-------------------------------------------------------------------------------------------------------------------------------------|
| Empirical formula                         | C <sub>154</sub> H <sub>208</sub> Cu <sub>9</sub> Mo <sub>36</sub> N <sub>88</sub> O <sub>183</sub> P <sub>12</sub> Sr <sub>2</sub> | C <sub>259</sub> H <sub>321</sub> Mo <sub>72</sub> N <sub>74</sub> Na <sub>2</sub> O <sub>324</sub> P <sub>24</sub> Sr <sub>4</sub> |
| Formula weight                            | 10176.21                                                                                                                            | 17702.30                                                                                                                            |
| Temperature/K                             | 296.15                                                                                                                              | 296.15                                                                                                                              |
| Crystal system                            | triclinic                                                                                                                           | triclinic                                                                                                                           |
| Space group                               | <i>P</i> $\bar{1}$                                                                                                                  | <i>P</i> $\bar{1}$                                                                                                                  |
| <i>a</i> (Å)                              | 17.8685(8)                                                                                                                          | 18.3207(5)                                                                                                                          |
| <i>b</i> (Å)                              | 20.0947(9)                                                                                                                          | 26.9821(8)                                                                                                                          |
| <i>c</i> (Å)                              | 42.1985(19)                                                                                                                         | 28.8827(9)                                                                                                                          |
| $\alpha$ (Å)                              | 97.054(2)                                                                                                                           | 116.8600(10)                                                                                                                        |
| $\beta$ (Å)                               | 100.416(2)                                                                                                                          | 94.4990(10)                                                                                                                         |
| $\gamma$ (Å)                              | 91.774(2)                                                                                                                           | 104.0350(10)                                                                                                                        |
| Volume(Å <sup>3</sup> )                   | 14767.4(12)                                                                                                                         | 12061.9(6)                                                                                                                          |
| <i>Z</i>                                  | 2                                                                                                                                   | 1                                                                                                                                   |
| <i>D<sub>c</sub></i> (g cm <sup>3</sup> ) | 2.289                                                                                                                               | 2.437                                                                                                                               |
| $\mu$ (mm <sup>-1</sup> )                 | 2.636                                                                                                                               | 2.438                                                                                                                               |
| <i>F</i> (000)                            | 9866.0                                                                                                                              | 8543.0                                                                                                                              |
| Reflections collected                     | 544505                                                                                                                              | 564785                                                                                                                              |
| Independent reflections                   | 51930                                                                                                                               | 47444                                                                                                                               |
| Data/restraints/parameters                | 51930/1071/3679                                                                                                                     | 47444/634/3390                                                                                                                      |
| GoF                                       | 1.054                                                                                                                               | 1.019                                                                                                                               |
| R indexes [ <i>I</i> ≥ 2σ ( <i>I</i> )]   | R <sub>1</sub> = 0.0742, wR <sub>2</sub> = 0.1963                                                                                   | R <sub>1</sub> = 0.0306, wR <sub>2</sub> = 0.0777                                                                                   |
| R [all data]                              | R <sub>1</sub> = 0.0834, wR <sub>2</sub> = 0.2002                                                                                   | R <sub>1</sub> = 0.0355, wR <sub>2</sub> = 0.0806                                                                                   |

$R_1 = \Sigma ||F_o| - |F_c| || / \Sigma |F_o|$ ;  $wR_2 = \{ \Sigma [w(F_o^2 - F_c^2)^2] / \Sigma [w(F_o^2)^2] \}^{1/2}$

Table S2. The bond lengths (Å) in complex 1.

|         |          |          |          |           |          |
|---------|----------|----------|----------|-----------|----------|
| Mo1–O12 | 2.045(7) | Mo15–O63 | 2.171(7) | Mo29–O98  | 1.923(7) |
| Mo1–O15 | 2.290(7) | Mo15–O83 | 1.775(7) | Mo29–O102 | 1.664(8) |

---

|          |          |           |          |           |          |
|----------|----------|-----------|----------|-----------|----------|
| Mo1-O21  | 1.828(7) | Mo15-O91  | 1.787(7) | Mo30-O17  | 2.300(7) |
| Mo1-O38  | 2.325(6) | Mo15-O107 | 1.678(7) | Mo30-O48  | 1.979(9) |
| Mo1-O90  | 1.692(7) | Mo16-O24  | 2.278(7) | Mo30-O54  | 1.875(7) |
| Mo1-O99  | 1.724(7) | Mo16-O39  | 2.244(7) | Mo30-O66  | 2.087(7) |
| Mo2-O2   | 2.218(7) | Mo16-O53  | 2.012(8) | Mo30-O81  | 1.886(7) |
| Mo2-O14  | 2.022(7) | Mo16-O96  | 1.892(7) | Mo30-O137 | 1.700(7) |
| Mo2-O30  | 2.024(7) | Mo16-O131 | 1.699(8) | Mo31-O33  | 1.776(7) |
| Mo2-O59  | 1.893(7) | Mo16-O140 | 1.707(8) | Mo31-O47  | 2.418(7) |
| Mo2-O67  | 1.912(7) | Mo17-O40  | 1.815(7) | Mo31-O55  | 1.799(8) |
| Mo2-O112 | 1.666(8) | Mo17-O42  | 2.056(7) | Mo31-O56  | 2.060(7) |
| Mo3-O6   | 2.404(7) | Mo17-O63  | 2.323(7) | Mo31-O60  | 2.149(7) |
| Mo3-O12  | 2.044(7) | Mo17-O86  | 2.309(7) | Mo31-O126 | 1.702(8) |
| Mo3-O38  | 2.133(7) | Mo17-O104 | 1.700(8) | Mo32-O6   | 2.410(7) |
| Mo3-O44  | 1.800(8) | Mo17-O125 | 1.711(8) | Mo32-O44  | 2.105(8) |
| Mo3-O62  | 1.774(7) | Mo18-O43  | 2.283(6) | Mo32-O70  | 2.038(7) |
| Mo3-O93  | 1.698(7) | Mo18-O58  | 1.904(7) | Mo32-O74  | 1.788(7) |
| Mo4-O1   | 2.203(7) | Mo18-O80  | 2.115(7) | Mo32-O80  | 1.791(7) |
| Mo4-O9   | 2.054(7) | Mo18-O81  | 1.876(7) | Mo32-O145 | 1.695(8) |
| Mo4-O41  | 1.886(7) | Mo18-O98  | 1.918(9) | Mo33-O22  | 2.289(7) |
| Mo4-O59  | 1.841(7) | Mo18-O148 | 1.690(7) | Mo33-O77  | 1.881(7) |
| Mo4-O83  | 2.057(6) | Mo19-O28  | 1.776(7) | Mo33-O82  | 1.930(8) |
| Mo4-O97  | 1.699(7) | Mo19-O32  | 2.414(7) | Mo33-O94  | 2.100(7) |
| Mo5-O13  | 2.195(7) | Mo19-O42  | 2.060(7) | Mo33-O101 | 1.867(8) |
| Mo5-O19  | 2.040(7) | Mo19-O78  | 1.807(8) | Mo33-O141 | 1.692(8) |
| Mo5-O52  | 1.837(7) | Mo19-O86  | 2.143(7) | Mo34-O31  | 2.282(7) |
| Mo5-O58  | 1.882(7) | Mo19-O127 | 1.692(8) | Mo34-O65  | 1.957(7) |
| Mo5-O62  | 2.079(7) | Mo20-O32  | 2.428(7) | Mo34-O73  | 2.105(7) |
| Mo5-O103 | 1.690(7) | Mo20-O66  | 1.784(7) | Mo34-O76  | 1.872(8) |
| Mo6-O3   | 2.225(7) | Mo20-O78  | 2.070(9) | Mo34-O123 | 1.879(8) |
| Mo6-O36  | 2.017(7) | Mo20-O84  | 1.797(8) | Mo34-O142 | 1.699(8) |
| Mo6-O50  | 1.886(7) | Mo20-O91  | 2.103(7) | Mo35-O22  | 2.291(7) |
| Mo6-O68  | 2.026(7) | Mo20-O121 | 1.696(7) | Mo35-O82  | 1.931(8) |
| Mo6-O76  | 1.906(8) | Mo21-O45  | 2.148(8) | Mo35-O108 | 2.090(8) |
| Mo6-O136 | 1.663(7) | Mo21-O47  | 2.391(6) | Mo35-O110 | 1.889(8) |
| Mo7-O4   | 2.200(7) | Mo21-O56  | 2.057(8) | Mo35-O123 | 1.871(8) |
| Mo7-O29  | 2.043(8) | Mo21-O87  | 1.786(8) | Mo35-O139 | 1.681(8) |
| Mo7-O35  | 1.857(7) | Mo21-O124 | 1.790(8) | Mo36-O47  | 2.428(7) |
| Mo7-O72  | 2.061(7) | Mo21-O135 | 1.686(7) | Mo36-O55  | 2.082(9) |
| Mo7-O95  | 1.887(8) | Mo22-O11  | 2.230(7) | Mo36-O94  | 1.786(8) |
| Mo7-O113 | 1.677(7) | Mo22-O33  | 2.037(7) | Mo36-O108 | 1.798(9) |
| Mo8-O5   | 2.223(6) | Mo22-O35  | 1.873(7) | Mo36-O124 | 2.078(8) |
| Mo8-O28  | 2.028(7) | Mo22-O61  | 2.051(8) | Mo36-O143 | 1.688(8) |
| Mo8-O52  | 1.896(7) | Mo22-O101 | 1.898(8) | Sr1-O3    | 2.652(7) |
| Mo8-O54  | 1.887(7) | Mo22-O118 | 1.685(7) | Sr1-O4    | 2.686(6) |

---

|           |          |           |          |          |           |
|-----------|----------|-----------|----------|----------|-----------|
| Mo8–O64   | 2.049(7) | Mo23–O17  | 2.297(8) | Sr1–O10  | 2.580(7)  |
| Mo8–O115  | 1.679(7) | Mo23–O41  | 1.898(7) | Sr1–O11  | 2.671(7)  |
| Mo9–O7    | 2.229(7) | Mo23–O48  | 1.898(8) | Sr1–O16  | 2.686(7)  |
| Mo9–O26   | 2.280(7) | Mo23–O84  | 2.098(8) | Sr1–O23  | 2.557(7)  |
| Mo9–O40   | 2.007(7) | Mo23–O85  | 1.863(7) | Sr1–O24  | 2.582(7)  |
| Mo9–O51   | 1.906(7) | Mo23–O109 | 1.657(8) | Sr1–O39  | 2.571(7)  |
| Mo9–O114  | 1.700(7) | Mo24–O16  | 2.206(7) | Sr1–O96  | 2.873(8)  |
| Mo9–O138  | 1.703(8) | Mo24–O37  | 2.049(7) | Sr2–O1   | 2.685(7)  |
| Mo10–O8   | 2.194(7) | Mo24–O50  | 1.848(7) | Sr2–O2   | 2.650(7)  |
| Mo10–O21  | 2.003(7) | Mo24–O87  | 2.049(7) | Sr2–O5   | 2.681(6)  |
| Mo10–O27  | 2.273(7) | Mo24–O110 | 1.887(8) | Sr2–O7   | 2.599(7)  |
| Mo10–O51  | 1.898(7) | Mo24–O119 | 1.697(7) | Sr2–O8   | 2.585(7)  |
| Mo10–O117 | 1.699(7) | Mo15–O42  | 2.054(8) | Mo29–O74 | 2.085(7)  |
| Mo10–O122 | 1.709(8) | Mo25–O45  | 2.325(7) | Mo29–O85 | 1.883(7)  |
| Mo11–O6   | 2.444(6) | Mo25–O53  | 1.813(8) | Sr2–O13  | 2.666(7)  |
| Mo11–O12  | 2.057(7) | Mo25–O56  | 2.052(8) | Sr2–O26  | 2.583(6)  |
| Mo11–O15  | 2.115(7) | Mo25–O60  | 2.299(7) | Sr2–O27  | 2.588(7)  |
| Mo11–O30  | 1.782(7) | Mo25–O128 | 1.705(7) | Sr2–O51  | 2.881(7)  |
| Mo11–O70  | 1.820(7) | Mo25–O129 | 1.706(8) | Cu1–O1W  | 1.994(11) |
| Mo11–O89  | 1.671(7) | Mo26–O18  | 2.420(7) | Cu1–O2W  | 1.972(11) |
| Mo12–O20  | 2.305(7) | Mo26–O69  | 2.077(8) | Cu1–O57  | 1.892(7)  |
| Mo12–O25  | 2.316(7) | Mo26–O73  | 1.805(8) | Cu1–O92  | 1.877(8)  |
| Mo12–O34  | 1.835(7) | Mo26–O79  | 2.050(8) | Cu2–N5   | 1.877(10) |
| Mo12–O46  | 2.049(7) | Mo26–O88  | 1.781(8) | Cu2–N7   | 1.880(11) |
| Mo12–O100 | 1.722(7) | Mo26–O144 | 1.686(8) | Cu3–N8   | 1.878(11) |
| Mo12–O133 | 1.697(7) | Mo27–O10  | 2.190(7) | Cu3–N12  | 1.870(11) |
| Mo13–O18  | 2.378(7) | Mo27–O23  | 2.281(7) | Cu4–N22  | 1.916(12) |
| Mo13–O25  | 2.132(7) | Mo27–O34  | 1.986(7) | Cu4–N24  | 1.89(2)   |
| Mo13–O46  | 2.045(7) | Mo27–O96  | 1.907(7) | Cu5–N34  | 1.86(3)   |
| Mo13–O69  | 1.791(7) | Mo27–O130 | 1.713(8) | Cu5–N45  | 1.86(2)   |
| Mo13–O72  | 1.780(7) | Mo27–O134 | 1.686(8) | Cu6–N19  | 1.896(13) |
| Mo13–O105 | 1.705(8) | Mo28–O31  | 2.290(7) | Cu6–N20  | 1.880(14) |
| Mo14–O18  | 2.431(7) | Mo28–O65  | 1.936(8) | Cu7–N28  | 1.878(16) |
| Mo14–O20  | 2.101(7) | Mo28–O77  | 1.880(7) | Cu7–N31  | 1.822(18) |
| Mo14–O46  | 2.054(7) | Mo28–O88  | 2.097(7) | Cu8–N13  | 1.862(11) |
| Mo14–O68  | 1.793(7) | Mo28–O95  | 1.880(8) | Cu8–N33  | 1.862(10) |
| Mo14–O79  | 1.810(8) | Mo28–O132 | 1.683(8) | Cu9–N38  | 1.868(15) |
| Mo14–O106 | 1.680(7) | Mo29–O43  | 2.322(8) | Cu9–N43  | 1.89(2)   |
| Mo15–O32  | 2.414(6) | Mo29–O67  | 1.882(7) |          |           |

Table S3. The bond angles (°) in complex 1.

|             |         |              |          |              |          |
|-------------|---------|--------------|----------|--------------|----------|
| O12–Mo1–O15 | 69.2(2) | O83–Mo15–O91 | 101.0(3) | O41–Mo23–O48 | 157.1(3) |
| O12–Mo1–O38 | 69.2(2) | O91–Mo15–    | 75.9(3)  | O41–Mo23–    | 88.3(3)  |

---

|             |          |                |          |               |          |
|-------------|----------|----------------|----------|---------------|----------|
|             |          | O32            |          | O84           |          |
| O15-Mo1-O38 | 82.6(2)  | O91-Mo15-O42   | 93.8(3)  | O48-Mo23-O17  | 72.9(3)  |
| O21-Mo1-O12 | 145.4(3) | O91-Mo15-O63   | 157.8(3) | O48-Mo23-O84  | 83.6(3)  |
| O21-Mo1-O15 | 84.9(3)  | O107-Mo15-O32  | 170.2(3) | O84-Mo23-O17  | 78.8(3)  |
| O21-Mo1-O38 | 85.4(3)  | O107-Mo15-O42  | 98.6(3)  | O85-Mo23-O17  | 88.4(3)  |
| O90-Mo1-O12 | 97.9(3)  | O107-Mo15-O63  | 98.3(3)  | O85-Mo23-O41  | 89.5(3)  |
| O90-Mo1-O15 | 88.5(3)  | O107-Mo15-O83  | 104.8(4) | O85-Mo23-O48  | 93.6(3)  |
| O90-Mo1-O21 | 104.3(3) | O107-Mo15-O91  | 100.8(4) | O85-Mo23-O84  | 167.1(3) |
| O90-Mo1-O38 | 166.3(3) | O39-Mo16-O24   | 75.2(3)  | O109-Mo23-O17 | 169.3(3) |
| O90-Mo1-O99 | 102.7(4) | O53-Mo16-O24   | 80.1(3)  | O109-Mo23-O41 | 100.5(4) |
| O99-Mo1-O12 | 97.1(3)  | O53-Mo16-O39   | 80.5(3)  | O109-Mo23-O48 | 101.2(4) |
| O99-Mo1-O15 | 163.6(3) | O96-Mo16-O24   | 78.9(3)  | O109-Mo23-O84 | 91.8(4)  |
| O99-Mo1-O21 | 103.5(3) | O96-Mo16-O39   | 79.1(3)  | O109-Mo23-O85 | 101.1(4) |
| O99-Mo1-O38 | 84.0(3)  | O96-Mo16-O53   | 153.8(3) | O37-Mo24-O16  | 77.9(3)  |
| O14-Mo2-O2  | 77.4(2)  | O131-Mo16-O24  | 89.2(4)  | O37-Mo24-O87  | 81.6(3)  |
| O14-Mo2-O30 | 82.3(3)  | O131-Mo16-O39  | 164.1(4) | O50-Mo24-O16  | 85.4(3)  |
| O30-Mo2-O2  | 83.0(3)  | O131-Mo16-O53  | 94.3(4)  | O50-Mo24-O37  | 92.0(3)  |
| O59-Mo2-O2  | 84.5(3)  | O131-Mo16-O96  | 101.0(4) | O50-Mo24-O87  | 167.0(3) |
| O59-Mo2-O14 | 93.9(3)  | O131-Mo16-O140 | 102.5(4) | O50-Mo24-O110 | 95.1(3)  |
| O59-Mo2-O30 | 167.5(3) | O140-Mo16-O24  | 168.1(3) | O87-Mo24-O16  | 82.2(3)  |
| O59-Mo2-O67 | 90.7(3)  | O140-Mo16-O39  | 93.0(3)  | O110-Mo24-O16 | 85.4(3)  |
| O67-Mo2-O2  | 84.1(3)  | O140-Mo16-O53  | 96.5(4)  | O110-Mo24-O37 | 161.2(3) |
| O67-Mo2-O14 | 160.4(3) | O140-Mo16-     | 100.7(4) | O110-Mo24-    | 87.8(3)  |

---

|                  |          |                    |          |                    |          |
|------------------|----------|--------------------|----------|--------------------|----------|
|                  |          | O96                |          | O87                |          |
| O67–Mo2–O30      | 89.1(3)  | O40–Mo17–<br>O42   | 144.8(3) | O119–Mo24–<br>O16  | 171.1(3) |
| O112–Mo2–O2      | 174.2(3) | O40–Mo17–<br>O63   | 85.1(3)  | O119–Mo24–<br>O37  | 94.7(3)  |
| O112–Mo2–<br>O14 | 97.4(3)  | O40–Mo17–<br>O86   | 84.3(3)  | O119–Mo24–<br>O50  | 99.9(3)  |
| O112–Mo2–<br>O30 | 94.0(3)  | O42–Mo17–<br>O63   | 69.1(3)  | O119–Mo24–<br>O87  | 91.9(3)  |
| O112–Mo2–<br>O59 | 98.3(3)  | O42–Mo17–<br>O86   | 69.6(3)  | O119–Mo24–<br>O110 | 101.2(4) |
| O112–Mo2–<br>O67 | 100.8(4) | O86–Mo17–<br>O63   | 83.2(3)  | O53–Mo25–<br>O45   | 85.6(3)  |
| O12–Mo3–O6       | 73.3(2)  | O104–Mo17–<br>O40  | 104.3(3) | O53–Mo25–<br>O56   | 145.7(3) |
| O12–Mo3–O38      | 73.3(3)  | O104–Mo17–<br>O42  | 97.9(3)  | O53–Mo25–<br>O60   | 84.5(3)  |
| O38–Mo3–O6       | 83.7(2)  | O104–Mo17–<br>O63  | 86.6(3)  | O56–Mo25–<br>O45   | 69.3(3)  |
| O44–Mo3–O6       | 75.8(3)  | O104–Mo17–<br>O86  | 166.1(3) | O56–Mo25–<br>O60   | 70.2(3)  |
| O44–Mo3–O12      | 93.5(3)  | O104–Mo17–<br>O125 | 101.9(4) | O60–Mo25–<br>O45   | 83.4(3)  |
| O44–Mo3–O38      | 158.2(3) | O125–Mo17–<br>O40  | 104.0(4) | O128–Mo25–<br>O45  | 85.6(3)  |
| O62–Mo3–O6       | 84.3(3)  | O125–Mo17–<br>O42  | 97.6(3)  | O128–Mo25–<br>O53  | 104.1(4) |
| O62–Mo3–O12      | 150.3(3) | O125–Mo17–<br>O63  | 165.2(3) | O128–Mo25–<br>O56  | 97.1(3)  |
| O62–Mo3–O38      | 85.4(3)  | O125–Mo17–<br>O86  | 86.2(3)  | O128–Mo25–<br>O60  | 165.5(4) |
| O62–Mo3–O44      | 99.7(3)  | O58–Mo18–<br>O43   | 84.1(3)  | O128–Mo25–<br>O129 | 102.5(4) |
| O93–Mo3–O6       | 171.4(3) | O58–Mo18–<br>O80   | 86.3(3)  | O129–Mo25–<br>O45  | 165.6(4) |
| O93–Mo3–O12      | 98.6(3)  | O58–Mo18–<br>O98   | 155.5(3) | O129–Mo25–<br>O53  | 103.7(4) |
| O93–Mo3–O38      | 96.8(3)  | O80–Mo18–<br>O43   | 78.5(2)  | O129–Mo25–<br>O56  | 97.6(4)  |
| O93–Mo3–O44      | 102.5(3) | O81–Mo18–<br>O43   | 89.7(3)  | O129–Mo25–<br>O60  | 86.5(3)  |
| O93–Mo3–O62      | 104.3(4) | O81–Mo18–<br>O58   | 91.1(3)  | O69–Mo26–<br>O18   | 69.9(2)  |
| O9–Mo4–O1        | 78.5(3)  | O81–Mo18–          | 168.0(3) | O73–Mo26–          | 87.4(3)  |

---

|             |          |                   |          |                   |          |
|-------------|----------|-------------------|----------|-------------------|----------|
|             |          | O80               |          | O18               |          |
| O9–Mo4–O83  | 81.5(3)  | O81–Mo18–<br>O98  | 93.8(3)  | O73–Mo26–<br>O69  | 156.3(3) |
| O41–Mo4–O1  | 85.2(3)  | O98–Mo18–<br>O43  | 72.0(3)  | O73–Mo26–<br>O79  | 89.3(3)  |
| O41–Mo4–O9  | 161.6(3) | O98–Mo18–<br>O80  | 84.0(3)  | O79–Mo26–<br>O18  | 70.2(3)  |
| O41–Mo4–O83 | 87.8(3)  | O148–Mo18–<br>O43 | 168.9(3) | O79–Mo26–<br>O69  | 77.0(3)  |
| O59–Mo4–O1  | 85.9(3)  | O148–Mo18–<br>O58 | 99.8(4)  | O88–Mo26–<br>O18  | 86.2(3)  |
| O59–Mo4–O9  | 92.4(3)  | O148–Mo18–<br>O80 | 91.4(3)  | O88–Mo26–<br>O69  | 89.5(3)  |
| O59–Mo4–O41 | 94.9(3)  | O148–Mo18–<br>O81 | 100.6(3) | O88–Mo26–<br>O73  | 95.9(3)  |
| O59–Mo4–O83 | 167.2(3) | O148–Mo18–<br>O98 | 102.8(4) | O88–Mo26–<br>O79  | 155.6(3) |
| O83–Mo4–O1  | 81.8(3)  | O28–Mo19–<br>O32  | 84.7(3)  | O144–Mo26–<br>O18 | 162.6(3) |
| O97–Mo4–O1  | 171.0(3) | O28–Mo19–<br>O42  | 150.2(3) | O144–Mo26–<br>O69 | 96.3(4)  |
| O97–Mo4–O9  | 94.7(3)  | O28–Mo19–<br>O78  | 99.5(3)  | O144–Mo26–<br>O73 | 104.5(4) |
| O97–Mo4–O41 | 100.5(3) | O28–Mo19–<br>O86  | 85.6(3)  | O144–Mo26–<br>O79 | 96.9(4)  |
| O97–Mo4–O59 | 100.5(3) | O42–Mo19–<br>O32  | 72.6(3)  | O144–Mo26–<br>O88 | 104.8(4) |
| O97–Mo4–O83 | 91.3(3)  | O42–Mo19–<br>O86  | 73.0(3)  | O10–Mo27–<br>O23  | 76.0(2)  |
| O19–Mo5–O13 | 78.3(3)  | O78–Mo19–<br>O32  | 74.6(3)  | O34–Mo27–<br>O10  | 81.6(3)  |
| O19–Mo5–O62 | 82.1(3)  | O78–Mo19–<br>O42  | 92.9(3)  | O34–Mo27–<br>O23  | 81.2(3)  |
| O52–Mo5–O13 | 86.3(3)  | O78–Mo19–<br>O86  | 156.6(3) | O96–Mo27–<br>O10  | 79.6(3)  |
| O52–Mo5–O19 | 93.2(3)  | O86–Mo19–<br>O32  | 83.3(3)  | O96–Mo27–<br>O23  | 79.0(3)  |
| O52–Mo5–O58 | 95.4(3)  | O127–Mo19–<br>O28 | 105.0(4) | O96–Mo27–<br>O34  | 155.4(3) |
| O52–Mo5–O62 | 167.9(3) | O127–Mo19–<br>O32 | 170.3(3) | O130–Mo27–<br>O10 | 165.2(3) |
| O58–Mo5–O13 | 84.9(3)  | O127–Mo19–<br>O42 | 98.5(3)  | O130–Mo27–<br>O23 | 89.4(3)  |
| O58–Mo5–O19 | 160.6(3) | O127–Mo19–        | 102.5(4) | O130–Mo27–        | 94.1(4)  |

---

|                  |          |                   |          |                    |          |
|------------------|----------|-------------------|----------|--------------------|----------|
|                  |          | O78               |          | O34                |          |
| O58–Mo5–O62      | 86.0(3)  | O127–Mo19–<br>O86 | 98.0(3)  | O130–Mo27–<br>O96  | 100.0(4) |
| O62–Mo5–O13      | 81.8(3)  | O66–Mo20–<br>O32  | 87.3(3)  | O134–Mo27–<br>O10  | 91.6(3)  |
| O103–Mo5–<br>O13 | 170.2(3) | O66–Mo20–<br>O78  | 91.5(3)  | O134–Mo27–<br>O23  | 167.6(3) |
| O103–Mo5–<br>O19 | 93.9(3)  | O66–Mo20–<br>O84  | 95.2(3)  | O134–Mo27–<br>O34  | 96.2(3)  |
| O103–Mo5–<br>O52 | 100.2(3) | O66–Mo20–<br>O91  | 157.1(3) | O134–Mo27–<br>O96  | 100.1(4) |
| O103–Mo5–<br>O58 | 101.7(4) | O78–Mo20–<br>O32  | 70.2(3)  | O134–Mo27–<br>O130 | 102.9(4) |
| O103–Mo5–<br>O62 | 91.3(3)  | O78–Mo20–<br>O91  | 75.9(3)  | O65–Mo28–<br>O31   | 71.8(3)  |
| O36–Mo6–O3       | 77.9(3)  | O84–Mo20–<br>O32  | 86.6(3)  | O65–Mo28–<br>O88   | 82.3(3)  |
| O36–Mo6–O68      | 82.5(3)  | O84–Mo20–<br>O78  | 155.5(3) | O77–Mo28–<br>O31   | 88.6(3)  |
| O50–Mo6–O3       | 85.0(3)  | O84–Mo20–<br>O91  | 89.4(3)  | O77–Mo28–<br>O65   | 92.6(3)  |
| O50–Mo6–O36      | 94.0(3)  | O91–Mo20–<br>O32  | 70.6(3)  | O77–Mo28–<br>O88   | 167.5(3) |
| O50–Mo6–O68      | 168.0(3) | O121–Mo20–<br>O32 | 163.7(3) | O77–Mo28–<br>O95   | 91.1(3)  |
| O50–Mo6–O76      | 91.2(3)  | O121–Mo20–<br>O66 | 103.5(4) | O88–Mo28–<br>O31   | 79.0(3)  |
| O68–Mo6–O3       | 83.1(3)  | O121–Mo20–<br>O78 | 97.0(4)  | O95–Mo28–<br>O31   | 85.0(3)  |
| O76–Mo6–O3       | 82.8(3)  | O121–Mo20–<br>O84 | 104.2(4) | O95–Mo28–<br>O65   | 156.4(3) |
| O76–Mo6–O36      | 159.5(3) | O121–Mo20–<br>O91 | 97.0(3)  | O95–Mo28–<br>O88   | 89.3(3)  |
| O76–Mo6–O68      | 88.3(3)  | O45–Mo21–<br>O47  | 83.8(3)  | O132–Mo28–<br>O31  | 168.4(4) |
| O136–Mo6–O3      | 174.7(3) | O56–Mo21–<br>O45  | 72.9(3)  | O132–Mo28–<br>O65  | 100.2(4) |
| O136–Mo6–<br>O36 | 97.8(4)  | O56–Mo21–<br>O47  | 73.2(3)  | O132–Mo28–<br>O77  | 100.3(4) |
| O136–Mo6–<br>O50 | 98.5(3)  | O87–Mo21–<br>O45  | 85.6(3)  | O132–Mo28–<br>O88  | 91.8(3)  |
| O136–Mo6–<br>O68 | 93.3(3)  | O87–Mo21–<br>O47  | 86.1(3)  | O132–Mo28–<br>O95  | 102.1(4) |
| O136–Mo6–        | 101.0(4) | O87–Mo21–         | 151.4(3) | O67–Mo29–          | 85.0(3)  |

|                  |          |                    |          |                   |          |
|------------------|----------|--------------------|----------|-------------------|----------|
| O76              |          | O56                |          | O43               |          |
| O29–Mo7–O4       | 78.6(3)  | O87–Mo21–<br>O124  | 100.4(4) | O67–Mo29–<br>O74  | 88.4(3)  |
| O29–Mo7–O72      | 82.5(3)  | O124–Mo21–<br>O45  | 157.9(3) | O67–Mo29–<br>O85  | 92.8(3)  |
| O35–Mo7–O4       | 86.0(3)  | O124–Mo21–<br>O47  | 75.5(3)  | O67–Mo29–<br>O98  | 155.4(3) |
| O35–Mo7–O29      | 92.2(3)  | O124–Mo21–<br>O56  | 93.4(3)  | O74–Mo29–<br>O43  | 78.9(3)  |
| O35–Mo7–O72      | 167.9(3) | O135–Mo21–<br>O45  | 98.7(4)  | O85–Mo29–<br>O43  | 87.3(3)  |
| O35–Mo7–O95      | 94.4(3)  | O135–Mo21–<br>O47  | 169.8(3) | O85–Mo29–<br>O74  | 166.0(3) |
| O72–Mo7–O4       | 82.3(3)  | O135–Mo21–<br>O56  | 97.9(4)  | O85–Mo29–<br>O98  | 91.1(3)  |
| O95–Mo7–O4       | 84.4(3)  | O135–Mo21–<br>O87  | 103.9(4) | O98–Mo29–<br>O43  | 71.0(3)  |
| O95–Mo7–O29      | 161.2(3) | O135–Mo21–<br>O124 | 100.4(4) | O98–Mo29–<br>O74  | 82.2(3)  |
| O95–Mo7–O72      | 87.6(3)  | O33–Mo22–<br>O11   | 82.6(3)  | O102–Mo29–<br>O43 | 170.3(3) |
| O113–Mo7–O4      | 171.2(3) | O33–Mo22–<br>O61   | 82.0(3)  | O102–Mo29–<br>O67 | 101.5(4) |
| O113–Mo7–<br>O29 | 94.4(4)  | O35–Mo22–<br>O11   | 85.1(3)  | O102–Mo29–<br>O74 | 93.9(3)  |
| O113–Mo7–<br>O35 | 99.8(3)  | O35–Mo22–<br>O33   | 167.4(3) | O102–Mo29–<br>O85 | 99.5(4)  |
| O113–Mo7–<br>O72 | 91.5(3)  | O35–Mo22–<br>O61   | 93.1(3)  | O102–Mo29–<br>O98 | 101.7(4) |
| O113–Mo7–<br>O95 | 101.7(4) | O35–Mo22–<br>O101  | 92.2(3)  | O48–Mo30–<br>O17  | 71.5(3)  |
| O28–Mo8–O5       | 82.3(3)  | O61–Mo22–<br>O11   | 77.8(3)  | O48–Mo30–<br>O66  | 82.9(3)  |
| O28–Mo8–O64      | 81.9(3)  | O42–Mo15–<br>O63   | 72.2(3)  | O54–Mo30–<br>O17  | 85.0(3)  |
| O52–Mo8–O5       | 84.3(3)  | O63–Mo15–<br>O32   | 83.4(2)  | O54–Mo30–<br>O48  | 156.1(3) |
| O52–Mo8–O28      | 166.4(3) | O83–Mo15–<br>O32   | 85.0(3)  | O54–Mo30–<br>O66  | 88.5(3)  |
| O52–Mo8–O64      | 93.0(3)  | O83–Mo15–<br>O42   | 149.3(3) | O54–Mo30–<br>O81  | 93.5(3)  |
| O54–Mo8–O5       | 84.2(3)  | O83–Mo15–<br>O63   | 84.8(3)  | O66–Mo30–<br>O17  | 78.8(3)  |
| O54–Mo8–O28      | 89.8(3)  | O83–Mo15–          | 101.0(3) | O81–Mo30–         | 88.2(3)  |

|               |          |                |          |               |          |
|---------------|----------|----------------|----------|---------------|----------|
|               |          | O91            |          | O17           |          |
| O54-Mo8-O52   | 91.0(3)  | O91-Mo15-O32   | 75.9(3)  | O81-Mo30-O48  | 90.0(3)  |
| O54-Mo8-O64   | 160.5(3) | O91-Mo15-O42   | 93.8(3)  | O81-Mo30-O66  | 166.6(3) |
| O64-Mo8-O5    | 77.3(3)  | O91-Mo15-O63   | 157.8(3) | O137-Mo30-O17 | 168.3(3) |
| O115-Mo8-O5   | 173.5(3) | O107-Mo15-O32  | 170.2(3) | O137-Mo30-O48 | 100.1(4) |
| O115-Mo8-O28  | 94.5(3)  | O107-Mo15-O42  | 98.6(3)  | O137-Mo30-O54 | 102.6(4) |
| O115-Mo8-O52  | 98.6(3)  | O107-Mo15-O63  | 98.3(3)  | O137-Mo30-O66 | 92.3(3)  |
| O115-Mo8-O54  | 101.5(4) | O107-Mo15-O83  | 104.8(4) | O137-Mo30-O81 | 100.1(3) |
| O115-Mo8-O64  | 96.7(4)  | O107-Mo15-O91  | 100.8(4) | O33-Mo31-O47  | 85.0(3)  |
| O7-Mo9-O26    | 75.9(2)  | O39-Mo16-O24   | 75.2(3)  | O33-Mo31-O55  | 100.1(4) |
| O40-Mo9-O7    | 81.0(3)  | O53-Mo16-O24   | 80.1(3)  | O33-Mo31-O56  | 150.5(3) |
| O40-Mo9-O26   | 79.9(3)  | O53-Mo16-O39   | 80.5(3)  | O33-Mo31-O60  | 85.7(3)  |
| O51-Mo9-O7    | 78.9(3)  | O96-Mo16-O24   | 78.9(3)  | O55-Mo31-O47  | 74.8(3)  |
| O51-Mo9-O26   | 79.8(3)  | O96-Mo16-O39   | 79.1(3)  | O55-Mo31-O56  | 92.4(3)  |
| O51-Mo9-O40   | 154.4(3) | O96-Mo16-O53   | 153.8(3) | O55-Mo31-O60  | 157.0(3) |
| O114-Mo9-O7   | 164.7(3) | O131-Mo16-O24  | 89.2(4)  | O56-Mo31-O47  | 72.6(3)  |
| O114-Mo9-O26  | 88.8(3)  | O131-Mo16-O39  | 164.1(4) | O56-Mo31-O60  | 73.1(3)  |
| O114-Mo9-O40  | 95.2(3)  | O131-Mo16-O53  | 94.3(4)  | O60-Mo31-O47  | 83.6(3)  |
| O114-Mo9-O51  | 100.0(3) | O131-Mo16-O96  | 101.0(4) | O126-Mo31-O33 | 105.0(4) |
| O114-Mo9-O138 | 101.9(4) | O131-Mo16-O140 | 102.5(4) | O126-Mo31-O47 | 170.0(3) |
| O138-Mo9-O7   | 93.3(3)  | O140-Mo16-O24  | 168.1(3) | O126-Mo31-O55 | 102.7(4) |
| O138-Mo9-O26  | 168.9(3) | O140-Mo16-O39  | 93.0(3)  | O126-Mo31-O56 | 98.1(4)  |
| O138-Mo9-     | 96.0(3)  | O140-Mo16-     | 96.5(4)  | O126-Mo31-    | 97.2(4)  |

|                |          |                |          |               |          |
|----------------|----------|----------------|----------|---------------|----------|
| O40            |          | O53            |          | O60           |          |
| O138–Mo9–O51   | 100.9(3) | O140–Mo16–O96  | 100.7(4) | O44–Mo32–O6   | 70.7(2)  |
| O8–Mo10–O27    | 76.4(3)  | O40–Mo17–O42   | 144.8(3) | O70–Mo32–O6   | 71.2(2)  |
| O21–Mo10–O8    | 81.1(3)  | O40–Mo17–O63   | 85.1(3)  | O70–Mo32–O44  | 77.0(3)  |
| O21–Mo10–O27   | 81.1(3)  | O40–Mo17–O86   | 84.3(3)  | O74–Mo32–O6   | 87.9(3)  |
| O51–Mo10–O8    | 80.1(3)  | O42–Mo17–O63   | 69.1(3)  | O74–Mo32–O44  | 158.0(3) |
| O51–Mo10–O21   | 155.4(3) | O42–Mo17–O86   | 69.6(3)  | O74–Mo32–O70  | 91.4(3)  |
| O51–Mo10–O27   | 79.2(3)  | O86–Mo17–O63   | 83.2(3)  | O74–Mo32–O80  | 96.5(3)  |
| O117–Mo10–O8   | 94.0(3)  | O104–Mo17–O40  | 104.3(3) | O80–Mo32–O6   | 84.4(3)  |
| O117–Mo10–O21  | 97.0(3)  | O104–Mo17–O42  | 97.9(3)  | O80–Mo32–O44  | 86.9(3)  |
| O117–Mo10–O27  | 170.4(3) | O104–Mo17–O63  | 86.6(3)  | O80–Mo32–O70  | 154.1(3) |
| O117–Mo10–O51  | 99.9(3)  | O104–Mo17–O86  | 166.1(3) | O145–Mo32–O6  | 163.1(3) |
| O117–Mo10–O122 | 101.2(4) | O104–Mo17–O125 | 101.9(4) | O145–Mo32–O44 | 95.2(4)  |
| O122–Mo10–O8   | 164.2(3) | O125–Mo17–O40  | 104.0(4) | O145–Mo32–O70 | 96.9(3)  |
| O122–Mo10–O21  | 92.8(3)  | O125–Mo17–O42  | 97.6(3)  | O145–Mo32–O74 | 104.8(4) |
| O122–Mo10–O27  | 88.3(3)  | O125–Mo17–O63  | 165.2(3) | O145–Mo32–O80 | 104.7(4) |
| O122–Mo10–O51  | 101.2(3) | O125–Mo17–O86  | 86.2(3)  | O77–Mo33–O22  | 89.4(3)  |
| O12–Mo11–O6    | 72.2(2)  | O58–Mo18–O43   | 84.1(3)  | O77–Mo33–O82  | 92.4(4)  |
| O12–Mo11–O15   | 72.6(3)  | O58–Mo18–O80   | 86.3(3)  | O77–Mo33–O94  | 168.2(3) |
| O15–Mo11–O6    | 83.1(2)  | O58–Mo18–O98   | 155.5(3) | O82–Mo33–O22  | 72.0(3)  |
| O30–Mo11–O6    | 85.7(3)  | O80–Mo18–O43   | 78.5(2)  | O82–Mo33–O94  | 82.9(3)  |
| O30–Mo11–O12   | 151.0(3) | O81–Mo18–O43   | 89.7(3)  | O94–Mo33–O22  | 78.9(3)  |
| O30–Mo11–      | 86.6(3)  | O81–Mo18–      | 91.1(3)  | O101–Mo33–    | 85.0(3)  |

|                   |          |                   |          |                    |          |
|-------------------|----------|-------------------|----------|--------------------|----------|
| O15               |          | O58               |          | O22                |          |
| O30–Mo11–<br>O70  | 99.5(3)  | O81–Mo18–<br>O80  | 168.0(3) | O101–Mo33–<br>O77  | 92.7(3)  |
| O70–Mo11–O6       | 73.8(3)  | O81–Mo18–<br>O98  | 93.8(3)  | O101–Mo33–<br>O82  | 156.4(3) |
| O70–Mo11–<br>O12  | 92.2(3)  | O98–Mo18–<br>O43  | 72.0(3)  | O101–Mo33–<br>O94  | 87.5(3)  |
| O70–Mo11–<br>O15  | 155.5(3) | O98–Mo18–<br>O80  | 84.0(3)  | O141–Mo33–<br>O22  | 169.0(3) |
| O89–Mo11–O6       | 169.7(3) | O148–Mo18–<br>O43 | 168.9(3) | O141–Mo33–<br>O77  | 99.6(4)  |
| O89–Mo11–<br>O12  | 98.8(3)  | O148–Mo18–<br>O58 | 99.8(4)  | O141–Mo33–<br>O82  | 100.9(4) |
| O89–Mo11–<br>O15  | 99.0(3)  | O148–Mo18–<br>O80 | 91.4(3)  | O141–Mo33–<br>O94  | 92.0(3)  |
| O89–Mo11–<br>O30  | 104.4(3) | O148–Mo18–<br>O81 | 100.6(3) | O141–Mo33–<br>O101 | 100.9(4) |
| O89–Mo11–<br>O70  | 102.3(3) | O148–Mo18–<br>O98 | 102.8(4) | O65–Mo34–<br>O31   | 71.7(3)  |
| O20–Mo12–<br>O25  | 82.1(2)  | O28–Mo19–<br>O32  | 84.7(3)  | O65–Mo34–<br>O73   | 82.5(3)  |
| O34–Mo12–<br>O20  | 85.1(3)  | O28–Mo19–<br>O42  | 150.2(3) | O73–Mo34–<br>O31   | 79.7(3)  |
| O34–Mo12–<br>O25  | 84.9(3)  | O28–Mo19–<br>O78  | 99.5(3)  | O76–Mo34–<br>O31   | 85.4(3)  |
| O34–Mo12–<br>O46  | 145.1(3) | O28–Mo19–<br>O86  | 85.6(3)  | O76–Mo34–<br>O65   | 156.2(3) |
| O46–Mo12–<br>O20  | 68.7(3)  | O42–Mo19–<br>O32  | 72.6(3)  | O76–Mo34–<br>O73   | 87.5(3)  |
| O46–Mo12–<br>O25  | 69.3(3)  | O42–Mo19–<br>O86  | 73.0(3)  | O76–Mo34–<br>O123  | 93.4(3)  |
| O100–Mo12–<br>O20 | 163.2(3) | O78–Mo19–<br>O32  | 74.6(3)  | O123–Mo34–<br>O31  | 88.5(3)  |
| O100–Mo12–<br>O25 | 84.7(3)  | O78–Mo19–<br>O42  | 92.9(3)  | O123–Mo34–<br>O65  | 92.1(3)  |
| O100–Mo12–<br>O34 | 104.0(3) | O78–Mo19–<br>O86  | 156.6(3) | O123–Mo34–<br>O73  | 168.0(3) |
| O100–Mo12–<br>O46 | 97.0(3)  | O86–Mo19–<br>O32  | 83.3(3)  | O142–Mo34–<br>O31  | 168.6(4) |
| O133–Mo12–<br>O20 | 87.8(3)  | O127–Mo19–<br>O28 | 105.0(4) | O142–Mo34–<br>O65  | 100.6(4) |
| O133–Mo12–<br>O25 | 165.8(3) | O127–Mo19–<br>O32 | 170.3(3) | O142–Mo34–<br>O73  | 91.2(4)  |
| O133–Mo12–        | 104.1(4) | O127–Mo19–        | 98.5(3)  | O142–Mo34–         | 101.1(4) |

|                    |          |                   |          |                    |          |
|--------------------|----------|-------------------|----------|--------------------|----------|
| O34                |          | O42               |          | O76                |          |
| O133–Mo12–<br>O46  | 97.8(4)  | O127–Mo19–<br>O78 | 102.5(4) | O142–Mo34–<br>O123 | 100.3(4) |
| O133–Mo12–<br>O100 | 103.2(4) | O127–Mo19–<br>O86 | 98.0(3)  | O82–Mo35–<br>O22   | 72.0(3)  |
| O25–Mo13–<br>O18   | 83.4(2)  | O66–Mo20–<br>O32  | 87.3(3)  | O82–Mo35–<br>O108  | 83.4(3)  |
| O46–Mo13–<br>O18   | 73.7(3)  | O66–Mo20–<br>O78  | 91.5(3)  | O108–Mo35–<br>O22  | 79.1(3)  |
| O46–Mo13–<br>O25   | 73.3(3)  | O66–Mo20–<br>O84  | 95.2(3)  | O110–Mo35–<br>O22  | 84.8(3)  |
| O69–Mo13–<br>O18   | 75.4(3)  | O66–Mo20–<br>O91  | 157.1(3) | O110–Mo35–<br>O82  | 156.5(3) |
| O69–Mo13–<br>O25   | 157.5(3) | O78–Mo20–<br>O32  | 70.2(3)  | O110–Mo35–<br>O108 | 88.7(3)  |
| O69–Mo13–<br>O46   | 93.3(3)  | O78–Mo20–<br>O91  | 75.9(3)  | O123–Mo35–<br>O22  | 87.5(3)  |
| O72–Mo13–<br>O18   | 85.9(3)  | O84–Mo20–<br>O32  | 86.6(3)  | O123–Mo35–<br>O82  | 93.0(3)  |
| O72–Mo13–<br>O25   | 85.0(3)  | O84–Mo20–<br>O78  | 155.5(3) | O123–Mo35–<br>O108 | 166.6(3) |
| O72–Mo13–<br>O46   | 151.4(3) | O84–Mo20–<br>O91  | 89.4(3)  | O123–Mo35–<br>O110 | 89.7(3)  |
| O72–Mo13–<br>O69   | 100.7(3) | O91–Mo20–<br>O32  | 70.6(3)  | O139–Mo35–<br>O22  | 170.1(4) |
| O105–Mo13–<br>O18  | 170.1(3) | O121–Mo20–<br>O32 | 163.7(3) | O139–Mo35–<br>O82  | 101.9(4) |
| O105–Mo13–<br>O25  | 98.0(3)  | O121–Mo20–<br>O66 | 103.5(4) | O139–Mo35–<br>O108 | 92.6(4)  |
| O105–Mo13–<br>O46  | 97.2(3)  | O121–Mo20–<br>O78 | 97.0(4)  | O139–Mo35–<br>O110 | 100.5(4) |
| O105–Mo13–<br>O69  | 101.6(4) | O121–Mo20–<br>O84 | 104.2(4) | O139–Mo35–<br>O123 | 100.8(4) |
| O105–Mo13–<br>O72  | 104.0(4) | O121–Mo20–<br>O91 | 97.0(3)  | O55–Mo36–<br>O47   | 70.2(3)  |
| O20–Mo14–<br>O18   | 83.5(2)  | O45–Mo21–<br>O47  | 83.8(3)  | O94–Mo36–<br>O47   | 86.5(3)  |
| O46–Mo14–<br>O18   | 72.3(3)  | O56–Mo21–<br>O45  | 72.9(3)  | O94–Mo36–<br>O55   | 90.7(3)  |
| O46–Mo14–<br>O20   | 72.8(3)  | O56–Mo21–<br>O47  | 73.2(3)  | O94–Mo36–<br>O108  | 95.9(4)  |
| O68–Mo14–<br>O18   | 85.9(3)  | O87–Mo21–<br>O45  | 85.6(3)  | O94–Mo36–<br>O124  | 155.8(3) |
| O68–Mo14–          | 87.0(3)  | O87–Mo21–         | 86.1(3)  | O108–Mo36–         | 86.5(3)  |

|               |          |                |          |                |           |
|---------------|----------|----------------|----------|----------------|-----------|
| O20           |          | O47            |          | O47            |           |
| O68–Mo14–O46  | 151.5(3) | O87–Mo21–O56   | 151.4(3) | O108–Mo36–O55  | 155.3(3)  |
| O68–Mo14–O79  | 98.3(3)  | O87–Mo21–O124  | 100.4(4) | O108–Mo36–O124 | 88.9(3)   |
| O79–Mo14–O18  | 73.5(3)  | O124–Mo21–O45  | 157.9(3) | O57–Cu1–O1W    | 90.6(4)   |
| O79–Mo14–O20  | 155.9(3) | O124–Mo21–O47  | 75.5(3)  | O57–Cu1–O2W    | 90.3(4)   |
| O79–Mo14–O46  | 92.9(3)  | O124–Mo21–O56  | 93.4(3)  | O92–Cu1–O1W    | 88.5(4)   |
| O106–Mo14–O18 | 169.6(3) | O135–Mo21–O45  | 98.7(4)  | O92–Cu1–O2W    | 90.6(4)   |
| O106–Mo14–O20 | 99.3(3)  | O101–Mo22–O11  | 83.7(3)  | O92–Cu1–O57    | 179.0(4)  |
| O106–Mo14–O46 | 98.8(3)  | O101–Mo22–O33  | 88.8(3)  | N5–Cu2–N7      | 168.9(5)  |
| O106–Mo14–O68 | 104.2(4) | O101–Mo22–O61  | 160.2(3) | N12–Cu3–N8     | 169.1(5)  |
| O106–Mo14–O79 | 102.1(4) | O118–Mo22–O11  | 174.0(4) | N24–Cu4–N22    | 162.9(8)  |
| O42–Mo15–O32  | 72.7(3)  | O118–Mo22–O33  | 94.1(3)  | N45–Cu5–N34    | 164.0(12) |
| O42–Mo15–O63  | 72.2(3)  | O118–Mo22–O35  | 98.0(3)  | N20–Cu6–N19    | 165.8(6)  |
| O63–Mo15–O32  | 83.4(2)  | O118–Mo22–O61  | 96.8(4)  | N31–Cu7–N28    | 176.7(9)  |
| O83–Mo15–O32  | 85.0(3)  | O118–Mo22–O101 | 101.3(4) | N33–Cu8–N13    | 166.7(5)  |
| O83–Mo15–O42  | 149.3(3) | O41–Mo23–O17   | 84.5(3)  | N38–Cu9–N43    | 176.8(10) |
| O83–Mo15–O63  | 84.8(3)  |                |          |                |           |

Table S4. The bond lengths (Å) in complex **2**.

|          |       |           |       |           |       |
|----------|-------|-----------|-------|-----------|-------|
| Mo1–O27  | 2.232 | Mo14–O43  | 2.442 | Mo27–O125 | 1.885 |
| Mo1–O28  | 2.226 | Mo14–O56  | 1.822 | Mo27–O127 | 1.707 |
| Mo1–O39  | 1.896 | Mo14–O85  | 1.681 | Mo28–O9   | 2.218 |
| Mo1–O46  | 2.029 | Mo14–O107 | 2.043 | Mo28–O15  | 1.898 |
| Mo1–O91  | 1.695 | Mo15–O24  | 2.299 | Mo28–O36  | 2.042 |
| Mo1–O143 | 1.705 | Mo15–O103 | 1.696 | Mo28–O69  | 1.675 |
| Mo2–O10  | 2.25  | Mo15–O107 | 2.05  | Mo28–O110 | 2.031 |
| Mo2–O90  | 1.699 | Mo15–O117 | 1.84  | Mo28–O111 | 1.88  |
| Mo2–O93  | 1.694 | Mo15–O122 | 2.332 | Mo29–O11  | 2.258 |

---

|          |       |           |       |           |       |
|----------|-------|-----------|-------|-----------|-------|
| Mo2-O115 | 2.272 | Mo15-O137 | 1.703 | Mo29-O31  | 1.974 |
| Mo2-O117 | 1.987 | Mo16-O43  | 2.43  | Mo29-O39  | 1.918 |
| Mo2-O125 | 1.919 | Mo16-O68  | 1.811 | Mo29-O82  | 1.715 |
| Mo3-O1   | 1.773 | Mo16-O71  | 1.779 | Mo29-O116 | 2.241 |
| Mo3-O19  | 2.045 | Mo16-O98  | 1.682 | Mo29-O146 | 1.692 |
| Mo3-O64  | 1.811 | Mo16-O107 | 2.064 | Mo30-O18  | 2.092 |
| Mo3-O95  | 1.686 | Mo16-O122 | 2.105 | Mo30-O19  | 2.052 |
| Mo3-O113 | 2.431 | Mo17-O8   | 2.216 | Mo30-O45  | 1.774 |
| Mo3-O114 | 2.128 | Mo17-O33  | 2.019 | Mo30-O112 | 1.827 |
| Mo4-O14  | 2.263 | Mo17-O53  | 1.875 | Mo30-O113 | 2.396 |
| Mo4-O40  | 1.886 | Mo17-O67  | 1.891 | Mo30-O139 | 1.679 |
| Mo4-O44  | 1.922 | Mo17-O77  | 2.041 | Mo31-O6   | 2.217 |
| Mo4-O96  | 1.68  | Mo17-O145 | 1.688 | Mo31-O13  | 2.033 |
| Mo4-O123 | 2.124 | Mo18-O17  | 2.305 | Mo31-O47  | 1.897 |
| Mo4-O124 | 1.867 | Mo18-O49  | 1.881 | Mo31-O50  | 2.027 |
| Mo5-O14  | 2.3   | Mo18-O120 | 1.935 | Mo31-O51  | 1.875 |
| Mo5-O34  | 1.897 | Mo18-O126 | 1.867 | Mo31-O129 | 1.679 |
| Mo5-O44  | 1.934 | Mo18-O132 | 2.097 | Mo32-O18  | 2.329 |
| Mo5-O54  | 2.109 | Mo18-O144 | 1.681 | Mo32-O19  | 2.065 |
| Mo5-O126 | 1.872 | Mo19-O26  | 2.318 | Mo32-O42  | 1.836 |
| Mo5-O142 | 1.672 | Mo19-O32  | 2.31  | Mo32-O89  | 1.7   |
| Mo6-O16  | 2.316 | Mo19-O35  | 2.041 | Mo32-O114 | 2.307 |
| Mo6-O20  | 2.049 | Mo19-O46  | 1.846 | Mo32-O135 | 1.707 |
| Mo6-O23  | 2.321 | Mo19-O138 | 1.702 | Mo33-O7   | 2.196 |
| Mo6-O31  | 1.845 | Mo19-O140 | 1.698 | Mo33-O41  | 2.035 |
| Mo6-O88  | 1.705 | Mo20-O37  | 2.279 | Mo33-O49  | 1.885 |
| Mo6-O128 | 1.703 | Mo20-O52  | 1.894 | Mo33-O71  | 2.033 |
| Mo7-O3   | 2.193 | Mo20-O75  | 1.854 | Mo33-O87  | 1.684 |
| Mo7-O53  | 1.861 | Mo20-O78  | 1.924 | Mo33-O109 | 1.874 |
| Mo7-O57  | 2.042 | Mo20-O81  | 2.121 | Mo34-O37  | 2.287 |
| Mo7-O61  | 2.063 | Mo20-O102 | 1.676 | Mo34-O78  | 1.918 |
| Mo7-O134 | 1.882 | Mo21-O25  | 2.302 | Mo34-O84  | 1.864 |
| Mo7-O136 | 1.674 | Mo21-O47  | 1.892 | Mo34-O101 | 1.694 |
| Mo8-O15  | 1.869 | Mo21-O72  | 2.087 | Mo34-O130 | 2.11  |
| Mo8-O17  | 2.251 | Mo21-O73  | 1.941 | Mo34-O134 | 1.877 |
| Mo8-O48  | 2.118 | Mo21-O75  | 1.881 | Mo35-O59  | 2.086 |
| Mo8-O97  | 1.686 | Mo21-O100 | 1.676 | Mo35-O63  | 2.063 |
| Mo8-O120 | 1.965 | Mo22-O32  | 2.11  | Mo35-O66  | 2.4   |
| Mo8-O124 | 1.882 | Mo22-O35  | 2.058 | Mo35-O72  | 1.81  |
| Mo9-O5   | 2.19  | Mo22-O59  | 1.807 | Mo35-O92  | 1.802 |
| Mo9-O51  | 1.854 | Mo22-O66  | 2.419 | Mo35-O106 | 1.681 |
| Mo9-O52  | 1.881 | Mo22-O77  | 1.776 | Mo36-O25  | 2.256 |
| Mo9-O62  | 2.05  | Mo22-O99  | 1.688 | Mo36-O67  | 1.877 |
| Mo9-O79  | 1.686 | Mo23-O21  | 2.394 | Mo36-O73  | 1.944 |

---

|           |       |           |       |           |       |
|-----------|-------|-----------|-------|-----------|-------|
| Mo9–O121  | 2.019 | Mo23–O58  | 2.073 | Mo36–O84  | 1.881 |
| Mo10–O54  | 1.778 | Mo23–O74  | 2.084 | Mo36–O92  | 2.081 |
| Mo10–O64  | 2.117 | Mo23–O81  | 1.803 | Mo36–O105 | 1.681 |
| Mo10–O76  | 1.701 | Mo23–O130 | 1.776 | Sr1–O2    | 2.721 |
| Mo10–O112 | 2.084 | Mo23–O141 | 1.69  | Sr1–O4    | 2.662 |
| Mo10–O113 | 2.392 | Mo24–O43  | 2.364 | Sr1–O7    | 2.682 |
| Mo10–O123 | 1.778 | Mo24–O48  | 1.805 | Sr1–O9    | 2.673 |
| Mo11–O16  | 2.124 | Mo24–O56  | 2.1   | Sr1–O10   | 2.564 |
| Mo11–O20  | 2.064 | Mo24–O68  | 2.057 | Sr1–O22   | 2.603 |
| Mo11–O21  | 2.437 | Mo24–O104 | 1.689 | Sr1–O108  | 2.556 |
| Mo11–O62  | 1.789 | Mo24–O132 | 1.788 | Sr1–O115  | 2.582 |
| Mo11–O74  | 1.806 | Mo25–O1   | 2.052 | Sr1–O125  | 2.804 |
| Mo11–O86  | 1.68  | Mo25–O4   | 2.218 | Sr2–O3    | 2.67  |
| Mo12–O26  | 2.102 | Mo25–O12  | 2.022 | Sr2–O5    | 2.673 |
| Mo12–O35  | 2.057 | Mo25–O40  | 1.875 | Sr2–O6    | 2.664 |
| Mo12–O50  | 1.785 | Mo25–O111 | 1.847 | Sr2–O8    | 2.677 |
| Mo12–O63  | 1.809 | Mo25–O133 | 1.676 | Sr2–O11   | 2.548 |
| Mo12–O66  | 2.412 | Mo26–O2   | 2.192 | Sr2–O27   | 2.581 |
| Mo12–O94  | 1.678 | Mo26–O29  | 2.042 | Sr2–O28   | 2.583 |
| Mo13–O20  | 2.053 | Mo26–O34  | 1.885 | Sr2–O39   | 2.783 |
| Mo13–O21  | 2.394 | Mo26–O45  | 2.039 | Sr2–O116  | 2.639 |
| Mo13–O23  | 2.095 | Mo26–O109 | 1.856 | Na1–O1W   | 2.381 |
| Mo13–O58  | 1.821 | Mo26–O119 | 1.692 | Na1–O2W   | 2.401 |
| Mo13–O61  | 1.768 | Mo27–O22  | 2.244 | Na1–O30   | 2.26  |
| Mo13–O83  | 1.687 | Mo27–O42  | 2.003 | Na1–O118  | 2.261 |
| Mo14–O24  | 2.107 | Mo27–O80  | 1.708 | Mo27–O125 | 1.885 |
| Mo14–O36  | 1.771 |           |       |           |       |

Table S5. The bond angles (°) in complex **2**.

|             |        |                |        |               |        |
|-------------|--------|----------------|--------|---------------|--------|
| O28–Mo1–O27 | 77.09  | O85–Mo14–O56   | 99.3   | O69–Mo28–O110 | 97.38  |
| O39–Mo1–O27 | 79.54  | O85–Mo14–O107  | 99.89  | O69–Mo28–O111 | 98.62  |
| O39–Mo1–O28 | 79.65  | O107–Mo14–O24  | 74.08  | O110–Mo28–O9  | 79.26  |
| O39–Mo1–O46 | 155.54 | O107–Mo14–O43  | 72.37  | O110–Mo28–O36 | 82.41  |
| O46–Mo1–O27 | 80.7   | O24–Mo15–O122  | 82.37  | O111–Mo28–O9  | 84.11  |
| O46–Mo1–O28 | 82.01  | O103–Mo15–O24  | 165.71 | O111–Mo28–O15 | 92.69  |
| O91–Mo1–O27 | 166.53 | O103–Mo15–O107 | 97.44  | O111–Mo28–O36 | 166.97 |

|               |        |                |        |                |        |
|---------------|--------|----------------|--------|----------------|--------|
| O91-Mo1-O28   | 89.7   | O103-Mo15-O117 | 103.23 | O111-Mo28-O110 | 93.22  |
| O91-Mo1-O39   | 100.91 | O103-Mo15-O122 | 86.83  | O31-Mo29-O11   | 81.78  |
| O91-Mo1-O46   | 95.01  | O103-Mo15-O137 | 102.86 | O31-Mo29-O116  | 81.25  |
| O91-Mo1-O143  | 102.04 | O107-Mo15-O24  | 69.91  | O39-Mo29-O11   | 76.55  |
| O143-Mo1-O27  | 91.03  | O107-Mo15-O122 | 68.61  | O39-Mo29-O31   | 153.57 |
| O143-Mo1-O28  | 167.87 | O117-Mo15-O24  | 85.19  | O39-Mo29-O116  | 79.44  |
| O143-Mo1-O39  | 100.8  | O117-Mo15-O107 | 145.45 | O82-Mo29-O11   | 90.54  |
| O143-Mo1-O46  | 93.81  | O117-Mo15-O122 | 85.09  | O82-Mo29-O31   | 95.7   |
| O10-Mo2-O115  | 76.01  | O137-Mo15-O24  | 85.63  | O82-Mo29-O39   | 99.43  |
| O90-Mo2-O10   | 91.63  | O137-Mo15-O107 | 96.4   | O82-Mo29-O116  | 167.94 |
| O90-Mo2-O115  | 167.59 | O137-Mo15-O117 | 105.44 | O116-Mo29-O11  | 77.5   |
| O90-Mo2-O117  | 97.06  | O137-Mo15-O122 | 163.33 | O146-Mo29-O11  | 166.77 |
| O90-Mo2-O125  | 99.51  | O68-Mo16-O43   | 74.86  | O146-Mo29-O31  | 99.03  |
| O93-Mo2-O10   | 165.63 | O68-Mo16-O107  | 91.25  | O146-Mo29-O39  | 98.69  |
| O93-Mo2-O90   | 102.74 | O68-Mo16-O122  | 155.05 | O146-Mo29-O82  | 102.48 |
| O93-Mo2-O115  | 89.64  | O71-Mo16-O43   | 84.57  | O146-Mo29-O116 | 89.54  |
| O93-Mo2-O117  | 96.79  | O71-Mo16-O68   | 99.48  | O18-Mo30-O113  | 83.66  |
| O93-Mo2-O125  | 99.66  | O71-Mo16-O107  | 151.02 | O19-Mo30-O18   | 73.86  |
| O117-Mo2-O10  | 80.75  | O71-Mo16-O122  | 86.87  | O19-Mo30-O113  | 73.39  |
| O117-Mo2-O115 | 82.16  | O98-Mo16-O43   | 171.68 | O45-Mo30-O18   | 87.15  |
| O125-Mo2-O10  | 78.12  | O98-Mo16-O68   | 102.95 | O45-Mo30-O19   | 152.8  |
| O125-Mo2-O115 | 77.19  | O98-Mo16-O71   | 103.74 | O45-Mo30-O112  | 99.33  |

|                   |        |                    |        |                    |        |
|-------------------|--------|--------------------|--------|--------------------|--------|
| O125–Mo2–<br>O117 | 153.39 | O98–Mo16–<br>O107  | 99.88  | O45–Mo30–<br>O113  | 85.52  |
| O1–Mo3–<br>O19    | 149.85 | O98–Mo16–<br>O122  | 98.84  | O112–Mo30–<br>O18  | 156.64 |
| O1–Mo3–<br>O64    | 100.33 | O107–Mo16–<br>O43  | 72.31  | O112–Mo30–<br>O19  | 91.56  |
| O1–Mo3–<br>O113   | 84.3   | O107–Mo16–<br>O122 | 73.02  | O112–Mo30–<br>O113 | 74.59  |
| O1–Mo3–<br>O114   | 85.74  | O122–Mo16–<br>O43  | 81.83  | O139–Mo30–<br>O18  | 98.98  |
| O19–Mo3–<br>O113  | 72.73  | O33–Mo17–<br>O8    | 79.17  | O139–Mo30–<br>O19  | 97.92  |
| O19–Mo3–<br>O114  | 72.87  | O33–Mo17–<br>O77   | 82.49  | O139–Mo30–<br>O45  | 104.25 |
| O64–Mo3–<br>O19   | 92.54  | O53–Mo17–<br>O8    | 84.62  | O139–Mo30–<br>O112 | 101.07 |
| O64–Mo3–<br>O113  | 75.19  | O53–Mo17–<br>O33   | 93.82  | O139–Mo30–<br>O113 | 169.94 |
| O64–Mo3–<br>O114  | 157.41 | O53–Mo17–<br>O67   | 92.19  | O13–Mo31–<br>O6    | 78.94  |
| O95–Mo3–<br>O1    | 104.55 | O53–Mo17–<br>O77   | 167.65 | O47–Mo31–<br>O6    | 84.43  |
| O95–Mo3–<br>O19   | 99.4   | O67–Mo17–<br>O8    | 82.84  | O47–Mo31–<br>O13   | 161.65 |
| O95–Mo3–<br>O64   | 101.35 | O67–Mo17–<br>O33   | 160.39 | O47–Mo31–<br>O50   | 87.42  |
| O95–Mo3–<br>O113  | 171.03 | O67–Mo17–<br>O77   | 87.69  | O50–Mo31–<br>O6    | 82.73  |
| O95–Mo3–<br>O114  | 98.06  | O77–Mo17–<br>O8    | 83.11  | O50–Mo31–<br>O13   | 82.84  |
| O114–Mo3–<br>O113 | 83.89  | O145–Mo17–<br>O8   | 176.06 | O51–Mo31–<br>O6    | 84.11  |
| O40–Mo4–<br>O14   | 84.95  | O145–Mo17–<br>O33  | 97.87  | O51–Mo31–<br>O13   | 93.09  |
| O40–Mo4–<br>O44   | 157.08 | O145–Mo17–<br>O53  | 98.23  | O51–Mo31–<br>O47   | 92.88  |
| O40–Mo4–<br>O123  | 87.6   | O145–Mo17–<br>O67  | 99.71  | O51–Mo31–<br>O50   | 166.74 |
| O44–Mo4–<br>O14   | 72.63  | O145–Mo17–<br>O77  | 93.96  | O129–Mo31–<br>O6   | 173.87 |
| O44–Mo4–<br>O123  | 83.43  | O49–Mo18–<br>O17   | 84.77  | O129–Mo31–<br>O13  | 95.69  |
| O96–Mo4–<br>O14   | 167.82 | O49–Mo18–<br>O120  | 155.89 | O129–Mo31–<br>O47  | 100.45 |

|                   |        |                    |        |                    |        |
|-------------------|--------|--------------------|--------|--------------------|--------|
| O96–Mo4–<br>O40   | 100.99 | O49–Mo18–<br>O132  | 86.98  | O129–Mo31–<br>O50  | 93.72  |
| O96–Mo4–<br>O44   | 100.21 | O120–Mo18–<br>O17  | 71.51  | O129–Mo31–<br>O51  | 99.25  |
| O96–Mo4–<br>O123  | 91.02  | O120–Mo18–<br>O132 | 84.06  | O19–Mo32–<br>O18   | 68.74  |
| O96–Mo4–<br>O124  | 101.32 | O126–Mo18–<br>O17  | 87.76  | O19–Mo32–<br>O114  | 68.85  |
| O123–Mo4–<br>O14  | 78.52  | O126–Mo18–<br>O49  | 91.5   | O42–Mo32–<br>O18   | 83.29  |
| O124–Mo4–<br>O14  | 89.03  | O126–Mo18–<br>O120 | 91.76  | O42–Mo32–<br>O19   | 144.67 |
| O124–Mo4–<br>O40  | 91.66  | O126–Mo18–<br>O132 | 165.81 | O42–Mo32–<br>O114  | 86.56  |
| O124–Mo4–<br>O44  | 92.63  | O132–Mo18–<br>O17  | 78.05  | O89–Mo32–<br>O18   | 87.97  |
| O124–Mo4–<br>O123 | 167.55 | O144–Mo18–<br>O17  | 168.86 | O89–Mo32–<br>O19   | 96.36  |
| O34–Mo5–<br>O14   | 84.56  | O144–Mo18–<br>O49  | 101.72 | O89–Mo32–<br>O42   | 104.01 |
| O34–Mo5–<br>O44   | 155.56 | O144–Mo18–<br>O120 | 101.08 | O89–Mo32–<br>O114  | 164.21 |
| O34–Mo5–<br>O54   | 86.67  | O144–Mo18–<br>O126 | 100.98 | O89–Mo32–<br>O135  | 102.61 |
| O44–Mo5–<br>O14   | 71.56  | O144–Mo18–<br>O132 | 93.14  | O114–Mo32–<br>O18  | 81.57  |
| O44–Mo5–<br>O54   | 83.67  | O32–Mo19–<br>O26   | 82.31  | O135–Mo32–<br>O18  | 164.95 |
| O54–Mo5–<br>O14   | 78.63  | O35–Mo19–<br>O26   | 69     | O135–Mo32–<br>O19  | 99.11  |
| O126–Mo5–<br>O14  | 87.59  | O35–Mo19–<br>O32   | 69.8   | O135–Mo32–<br>O42  | 104.1  |
| O126–Mo5–<br>O34  | 91.64  | O46–Mo19–<br>O26   | 84.81  | O135–Mo32–<br>O114 | 85.76  |
| O126–Mo5–<br>O44  | 92.45  | O46–Mo19–<br>O32   | 84.74  | O41–Mo33–<br>O7    | 78.34  |
| O126–Mo5–<br>O54  | 166.21 | O46–Mo19–<br>O35   | 145.19 | O49–Mo33–<br>O7    | 84.58  |
| O142–Mo5–<br>O14  | 169.19 | O138–Mo19–<br>O26  | 166.24 | O49–Mo33–<br>O41   | 161.27 |
| O142–Mo5–<br>O34  | 102.72 | O138–Mo19–<br>O32  | 87.46  | O49–Mo33–<br>O71   | 88.5   |
| O142–Mo5–<br>O44  | 100.26 | O138–Mo19–<br>O35  | 98.85  | O71–Mo33–<br>O7    | 82.71  |

|                   |        |                    |        |                    |        |
|-------------------|--------|--------------------|--------|--------------------|--------|
| O142–Mo5–<br>O54  | 93.67  | O138–Mo19–<br>O46  | 103.45 | O71–Mo33–<br>O41   | 81.82  |
| O142–Mo5–<br>O126 | 100.05 | O140–Mo19–<br>O26  | 86.31  | O87–Mo33–<br>O7    | 172.75 |
| O16–Mo6–<br>O23   | 82.33  | O140–Mo19–<br>O32  | 165.81 | O87–Mo33–<br>O41   | 95.37  |
| O20–Mo6–<br>O16   | 69.13  | O140–Mo19–<br>O35  | 98.21  | O87–Mo33–<br>O49   | 101.11 |
| O20–Mo6–<br>O23   | 69.22  | O140–Mo19–<br>O46  | 102.69 | O87–Mo33–<br>O71   | 92.88  |
| O31–Mo6–<br>O16   | 83.45  | O140–Mo19–<br>O138 | 102.27 | O87–Mo33–<br>O109  | 98.24  |
| O31–Mo6–<br>O20   | 144.71 | O52–Mo20–<br>O37   | 83.81  | O109–Mo33–<br>O7   | 85.89  |
| O31–Mo6–<br>O23   | 85.92  | O52–Mo20–<br>O78   | 155.28 | O109–Mo33–<br>O41  | 93.69  |
| O88–Mo6–<br>O16   | 165.05 | O52–Mo20–<br>O81   | 87.27  | O109–Mo33–<br>O49  | 92.68  |
| O88–Mo6–<br>O20   | 98.99  | O75–Mo20–<br>O37   | 88.46  | O109–Mo33–<br>O71  | 168.37 |
| O88–Mo6–<br>O23   | 84.95  | O75–Mo20–<br>O52   | 91.62  | O78–Mo34–<br>O37   | 71.83  |
| O88–Mo6–<br>O31   | 103.46 | O75–Mo20–<br>O78   | 92.3   | O78–Mo34–<br>O130  | 83.3   |
| O128–Mo6–<br>O16  | 88.41  | O75–Mo20–<br>O81   | 167.58 | O84–Mo34–<br>O37   | 88.12  |
| O128–Mo6–<br>O20  | 97.29  | O78–Mo20–<br>O37   | 71.91  | O84–Mo34–<br>O78   | 92.41  |
| O128–Mo6–<br>O23  | 165.67 | O78–Mo20–<br>O81   | 83.72  | O84–Mo34–<br>O130  | 166.62 |
| O128–Mo6–<br>O31  | 103.92 | O81–Mo20–<br>O37   | 79.13  | O84–Mo34–<br>O134  | 91.27  |
| O128–Mo6–<br>O88  | 102.47 | O102–Mo20–<br>O37  | 168.93 | O101–Mo34–<br>O37  | 169.44 |
| O53–Mo7–<br>O3    | 86.26  | O102–Mo20–<br>O52  | 100.95 | O101–Mo34–<br>O78  | 101.06 |
| O53–Mo7–<br>O57   | 92.78  | O102–Mo20–<br>O75  | 101.3  | O101–Mo34–<br>O84  | 100.18 |
| O53–Mo7–<br>O61   | 167.63 | O102–Mo20–<br>O78  | 102.19 | O101–Mo34–<br>O130 | 93.1   |
| O53–Mo7–<br>O134  | 94.26  | O102–Mo20–<br>O81  | 91.04  | O101–Mo34–<br>O134 | 101.63 |
| O57–Mo7–<br>O3    | 78.06  | O47–Mo21–<br>O25   | 85     | O130–Mo34–<br>O37  | 78.5   |

|                   |        |                   |        |                    |        |
|-------------------|--------|-------------------|--------|--------------------|--------|
| O57–Mo7–<br>O61   | 81.54  | O47–Mo21–<br>O72  | 86.87  | O134–Mo34–<br>O37  | 84.57  |
| O61–Mo7–<br>O3    | 81.83  | O47–Mo21–<br>O73  | 156.23 | O134–Mo34–<br>O78  | 155.97 |
| O134–Mo7–<br>O3   | 84.57  | O72–Mo21–<br>O25  | 78.79  | O134–Mo34–<br>O130 | 87.69  |
| O134–Mo7–<br>O57  | 160.78 | O73–Mo21–<br>O25  | 71.64  | O59–Mo35–<br>O66   | 70.98  |
| O134–Mo7–<br>O61  | 87.94  | O73–Mo21–<br>O72  | 84.37  | O63–Mo35–<br>O59   | 76.88  |
| O136–Mo7–<br>O3   | 170.98 | O75–Mo21–<br>O25  | 87.43  | O63–Mo35–<br>O66   | 71.88  |
| O136–Mo7–<br>O53  | 100    | O75–Mo21–<br>O47  | 91.51  | O72–Mo35–<br>O59   | 156.52 |
| O136–Mo7–<br>O57  | 95.03  | O75–Mo21–<br>O72  | 166.21 | O72–Mo35–<br>O63   | 89.45  |
| O136–Mo7–<br>O61  | 91.49  | O75–Mo21–<br>O73  | 91.79  | O72–Mo35–<br>O66   | 86.75  |
| O136–Mo7–<br>O134 | 101.31 | O100–Mo21–<br>O25 | 170.13 | O92–Mo35–<br>O59   | 89.35  |
| O15–Mo8–<br>O17   | 85.67  | O100–Mo21–<br>O47 | 101.3  | O92–Mo35–<br>O63   | 156.31 |
| O15–Mo8–<br>O48   | 89.2   | O100–Mo21–<br>O72 | 93.85  | O92–Mo35–<br>O66   | 85.51  |
| O15–Mo8–<br>O120  | 157.5  | O100–Mo21–<br>O73 | 101.31 | O92–Mo35–<br>O72   | 96.41  |
| O15–Mo8–<br>O124  | 92.33  | O100–Mo21–<br>O75 | 99.89  | O106–Mo35–<br>O59  | 96.38  |
| O48–Mo8–<br>O17   | 79.75  | O32–Mo22–<br>O66  | 84.84  | O106–Mo35–<br>O63  | 96.42  |
| O97–Mo8–<br>O15   | 103.12 | O35–Mo22–<br>O32  | 73.68  | O106–Mo35–<br>O66  | 164.17 |
| O97–Mo8–<br>O17   | 167.91 | O35–Mo22–<br>O66  | 72.64  | O106–Mo35–<br>O72  | 104.14 |
| O97–Mo8–<br>O48   | 91.94  | O59–Mo22–<br>O32  | 157.85 | O106–Mo35–<br>O92  | 104.29 |
| O97–Mo8–<br>O120  | 98.17  | O59–Mo22–<br>O35  | 91.37  | O67–Mo36–<br>O25   | 85.71  |
| O97–Mo8–<br>O124  | 99.11  | O59–Mo22–<br>O66  | 74.96  | O67–Mo36–<br>O73   | 157.95 |
| O120–Mo8–<br>O17  | 72.25  | O77–Mo22–<br>O32  | 86.55  | O67–Mo36–<br>O84   | 92.23  |
| O120–Mo8–<br>O48  | 82.82  | O77–Mo22–<br>O35  | 151.43 | O67–Mo36–<br>O92   | 88.43  |

|                   |        |                    |        |                   |        |
|-------------------|--------|--------------------|--------|-------------------|--------|
| O124–Mo8–<br>O17  | 88.68  | O77–Mo22–<br>O59   | 100.6  | O73–Mo36–<br>O25  | 72.65  |
| O124–Mo8–<br>O48  | 168.18 | O77–Mo22–<br>O66   | 85.45  | O73–Mo36–<br>O92  | 83.48  |
| O124–Mo8–<br>O120 | 91.43  | O99–Mo22–<br>O32   | 98.28  | O84–Mo36–<br>O25  | 88.24  |
| O51–Mo9–<br>O5    | 85.87  | O99–Mo22–<br>O35   | 98.19  | O84–Mo36–<br>O73  | 91.34  |
| O51–Mo9–<br>O52   | 93.58  | O99–Mo22–<br>O59   | 100.01 | O84–Mo36–<br>O92  | 167.4  |
| O51–Mo9–<br>O62   | 168.89 | O99–Mo22–<br>O66   | 169.18 | O92–Mo36–<br>O25  | 79.25  |
| O51–Mo9–<br>O121  | 93.78  | O99–Mo22–<br>O77   | 105.02 | O105–Mo36–<br>O25 | 169.32 |
| O52–Mo9–<br>O5    | 84.02  | O58–Mo23–<br>O21   | 71.26  | O105–Mo36–<br>O67 | 101.89 |
| O52–Mo9–<br>O62   | 87.55  | O58–Mo23–<br>O74   | 76.56  | O105–Mo36–<br>O73 | 99.04  |
| O52–Mo9–<br>O121  | 161.28 | O74–Mo23–<br>O21   | 71.17  | O105–Mo36–<br>O84 | 98.84  |
| O62–Mo9–<br>O5    | 83.26  | O81–Mo23–<br>O21   | 87.02  | O105–Mo36–<br>O92 | 93.33  |
| O79–Mo9–<br>O5    | 173.01 | O81–Mo23–<br>O58   | 156.46 | O2–Sr1–<br>O125   | 131.74 |
| O79–Mo9–<br>O51   | 98.26  | O81–Mo23–<br>O74   | 88.12  | O4–Sr1–O2         | 53.97  |
| O79–Mo9–<br>O52   | 101.27 | O130–Mo23–<br>O21  | 86.8   | O4–Sr1–O7         | 95.99  |
| O79–Mo9–<br>O62   | 92.34  | O130–Mo23–<br>O58  | 90.79  | O4–Sr1–O9         | 73.12  |
| O79–Mo9–<br>O121  | 94.67  | O130–Mo23–<br>O74  | 157.11 | O4–Sr1–<br>O125   | 131.75 |
| O121–Mo9–<br>O5   | 79.37  | O130–Mo23–<br>O81  | 97.12  | O7–Sr1–O2         | 71.62  |
| O121–Mo9–<br>O62  | 82.01  | O141–Mo23–<br>O21  | 161.68 | O7–Sr1–<br>O125   | 132.25 |
| O54–Mo10–<br>O64  | 157.44 | O141–Mo23–<br>O58  | 94.46  | O9–Sr1–O2         | 96.74  |
| O54–Mo10–<br>O112 | 91.04  | O141–Mo23–<br>O74  | 94.78  | O9–Sr1–O7         | 54.27  |
| O54–Mo10–<br>O113 | 87.46  | O141–Mo23–<br>O81  | 104.68 | O9–Sr1–<br>O125   | 131.51 |
| O64–Mo10–<br>O113 | 71.2   | O141–Mo23–<br>O130 | 105.3  | O10–Sr1–O2        | 169.54 |

|                    |        |                    |        |                   |        |
|--------------------|--------|--------------------|--------|-------------------|--------|
| O76–Mo10–<br>O54   | 105.3  | O48–Mo24–<br>O43   | 87.46  | O10–Sr1–O4        | 120.26 |
| O76–Mo10–<br>O64   | 93.85  | O48–Mo24–<br>O56   | 88.89  | O10–Sr1–O7        | 101.87 |
| O76–Mo10–<br>O112  | 94.79  | O48–Mo24–<br>O68   | 158.15 | O10–Sr1–O9        | 72.82  |
| O76–Mo10–<br>O113  | 161.05 | O56–Mo24–<br>O43   | 71.52  | O10–Sr1–<br>O22   | 117.77 |
| O76–Mo10–<br>O123  | 105.52 | O68–Mo24–<br>O43   | 72.43  | O10–Sr1–<br>O115  | 65.5   |
| O112–Mo10–<br>O64  | 75.31  | O68–Mo24–<br>O56   | 76.87  | O10–Sr1–<br>O125  | 58.7   |
| O112–Mo10–<br>O113 | 70.61  | O104–Mo24–<br>O43  | 162.64 | O22–Sr1–O2        | 72.69  |
| O123–Mo10–<br>O54  | 97.08  | O104–Mo24–<br>O48  | 102.7  | O22–Sr1–O4        | 102.09 |
| O123–Mo10–<br>O64  | 88.97  | O104–Mo24–<br>O56  | 94.38  | O22–Sr1–O7        | 117.6  |
| O123–Mo10–<br>O112 | 155.16 | O104–Mo24–<br>O68  | 94.94  | O22–Sr1–O9        | 168.96 |
| O123–Mo10–<br>O113 | 86.29  | O104–Mo24–<br>O132 | 105.03 | O22–Sr1–<br>O125  | 59.11  |
| O16–Mo11–<br>O21   | 82.94  | O132–Mo24–<br>O43  | 87.53  | O108–Sr1–<br>O2   | 101.35 |
| O20–Mo11–<br>O16   | 72.82  | O132–Mo24–<br>O48  | 96.23  | O108–Sr1–<br>O4   | 73.57  |
| O20–Mo11–<br>O21   | 72.28  | O132–Mo24–<br>O56  | 158.23 | O108–Sr1–<br>O7   | 169.57 |
| O62–Mo11–<br>O16   | 86.17  | O132–Mo24–<br>O68  | 91.48  | O108–Sr1–<br>O9   | 120.69 |
| O62–Mo11–<br>O20   | 150.93 | O1–Mo25–<br>O4     | 81.87  | O108–Sr1–<br>O10  | 83.89  |
| O62–Mo11–<br>O21   | 85.64  | O12–Mo25–<br>O1    | 82.31  | O108–Sr1–<br>O22  | 65.87  |
| O62–Mo11–<br>O74   | 99.68  | O12–Mo25–<br>O4    | 77.88  | O108–Sr1–<br>O115 | 116.4  |
| O74–Mo11–<br>O16   | 156.15 | O40–Mo25–<br>O1    | 87.67  | O108–Sr1–<br>O125 | 58.18  |
| O74–Mo11–<br>O20   | 92.56  | O40–Mo25–<br>O4    | 84.11  | O115–Sr1–<br>O2   | 118.8  |
| O74–Mo11–<br>O21   | 74.55  | O40–Mo25–<br>O12   | 160.43 | O115–Sr1–<br>O4   | 169.69 |
| O86–Mo11–<br>O16   | 99.16  | O111–Mo25–<br>O1   | 167.16 | O115–Sr1–<br>O7   | 74.02  |

|                  |        |                    |        |                   |        |
|------------------|--------|--------------------|--------|-------------------|--------|
| O86–Mo11–<br>O20 | 98.98  | O111–Mo25–<br>O4   | 85.57  | O115–Sr1–<br>O9   | 102.15 |
| O86–Mo11–<br>O21 | 170.09 | O111–Mo25–<br>O12  | 92.51  | O115–Sr1–<br>O22  | 80.88  |
| O86–Mo11–<br>O62 | 104.12 | O111–Mo25–<br>O40  | 93.68  | O115–Sr1–<br>O125 | 58.25  |
| O86–Mo11–<br>O74 | 101.73 | O133–Mo25–<br>O1   | 92.68  | O3–Sr2–O5         | 54.5   |
| O26–Mo12–<br>O66 | 81.62  | O133–Mo25–<br>O4   | 172.11 | O3–Sr2–O8         | 73     |
| O35–Mo12–<br>O26 | 73.17  | O133–Mo25–<br>O12  | 95.79  | O3–Sr2–O39        | 130.79 |
| O35–Mo12–<br>O66 | 72.81  | O133–Mo25–<br>O40  | 101.45 | O5–Sr2–O8         | 97.86  |
| O50–Mo12–<br>O26 | 87.03  | O133–Mo25–<br>O111 | 99.54  | O5–Sr2–O39        | 131.27 |
| O50–Mo12–<br>O35 | 151.87 | O29–Mo26–<br>O2    | 78.36  | O6–Sr2–O3         | 96.98  |
| O50–Mo12–<br>O63 | 98.61  | O34–Mo26–<br>O2    | 84.69  | O6–Sr2–O5         | 73.22  |
| O50–Mo12–<br>O66 | 84.9   | O34–Mo26–<br>O29   | 161.49 | O6–Sr2–O8         | 54.56  |
| O63–Mo12–<br>O26 | 155.96 | O34–Mo26–<br>O45   | 88.38  | O6–Sr2–O39        | 132.23 |
| O63–Mo12–<br>O35 | 92.39  | O45–Mo26–<br>O2    | 82.62  | O8–Sr2–O39        | 130.86 |
| O63–Mo12–<br>O66 | 75.69  | O45–Mo26–<br>O29   | 82.18  | O11–Sr2–O3        | 72.58  |
| O94–Mo12–<br>O26 | 98.5   | O109–Mo26–<br>O2   | 85.09  | O11–Sr2–O5        | 100.21 |
| O94–Mo12–<br>O35 | 99.13  | O109–Mo26–<br>O29  | 92.16  | O11–Sr2–O6        | 169.55 |
| O94–Mo12–<br>O50 | 103.5  | O109–Mo26–<br>O34  | 93.75  | O11–Sr2–O8        | 119.88 |
| O94–Mo12–<br>O63 | 102.78 | O109–Mo26–<br>O45  | 167.28 | O11–Sr2–<br>O27   | 84.63  |
| O94–Mo12–<br>O66 | 171.6  | O119–Mo26–<br>O2   | 172.11 | O11–Sr2–<br>O28   | 117.28 |
| O20–Mo13–<br>O21 | 73.4   | O119–Mo26–<br>O29  | 94.98  | O11–Sr2–<br>O39   | 58.21  |
| O20–Mo13–<br>O23 | 73.84  | O119–Mo26–<br>O34  | 101.3  | O11–Sr2–<br>O116  | 65.74  |
| O23–Mo13–<br>O21 | 84.05  | O119–Mo26–<br>O45  | 92.34  | O27–Sr2–O3        | 119.37 |

|                   |        |                    |        |                  |        |
|-------------------|--------|--------------------|--------|------------------|--------|
| O58–Mo13–<br>O20  | 91.96  | O119–Mo26–<br>O109 | 99.52  | O27–Sr2–O5       | 169.53 |
| O58–Mo13–<br>O21  | 75.36  | O22–Mo27–<br>O108  | 76.86  | O27–Sr2–O6       | 100.58 |
| O58–Mo13–<br>O23  | 157.74 | O42–Mo27–<br>O22   | 80.96  | O27–Sr2–O8       | 71.72  |
| O61–Mo13–<br>O20  | 151.43 | O42–Mo27–<br>O108  | 80.33  | O27–Sr2–<br>O28  | 65.08  |
| O61–Mo13–<br>O21  | 84.6   | O80–Mo27–<br>O22   | 90.14  | O27–Sr2–<br>O39  | 59.14  |
| O61–Mo13–<br>O23  | 86.17  | O80–Mo27–<br>O42   | 97.64  | O27–Sr2–<br>O116 | 118    |
| O61–Mo13–<br>O58  | 100.01 | O80–Mo27–<br>O108  | 167    | O28–Sr2–O3       | 170.05 |
| O83–Mo13–<br>O20  | 98.49  | O80–Mo27–<br>O125  | 100.8  | O28–Sr2–O5       | 119.52 |
| O83–Mo13–<br>O21  | 170.51 | O125–Mo27–<br>O22  | 80.18  | O28–Sr2–O6       | 73.17  |
| O83–Mo13–<br>O23  | 98.61  | O125–Mo27–<br>O42  | 153.53 | O28–Sr2–O8       | 101.48 |
| O83–Mo13–<br>O58  | 100.42 | O125–Mo27–<br>O108 | 77.42  | O28–Sr2–<br>O39  | 59.1   |
| O83–Mo13–<br>O61  | 104.62 | O127–Mo27–<br>O22  | 167.59 | O28–Sr2–<br>O116 | 81.64  |
| O24–Mo14–<br>O43  | 85.28  | O127–Mo27–<br>O42  | 94.92  | O116–Sr2–<br>O3  | 102.44 |
| O36–Mo14–<br>O24  | 86.1   | O127–Mo27–<br>O80  | 102.04 | O116–Sr2–<br>O5  | 72.46  |
| O36–Mo14–<br>O43  | 85.03  | O127–Mo27–<br>O108 | 90.93  | O116–Sr2–<br>O6  | 118.38 |
| O36–Mo14–<br>O56  | 100.13 | O127–Mo27–<br>O125 | 99.57  | O116–Sr2–<br>O8  | 169.96 |
| O36–Mo14–<br>O107 | 150.79 | O15–Mo28–<br>O9    | 83.11  | O116–Sr2–<br>O39 | 58.92  |
| O56–Mo14–<br>O24  | 157.77 | O15–Mo28–<br>O36   | 87.77  | O1W–Na1–<br>O2W  | 178.43 |
| O56–Mo14–<br>O43  | 74.14  | O15–Mo28–<br>O110  | 160.7  | O30–Na1–<br>O1W  | 90.02  |
| O56–Mo14–<br>O107 | 91.41  | O36–Mo28–<br>O9    | 83.02  | O30–Na1–<br>O2W  | 89.44  |
| O85–Mo14–<br>O24  | 99.72  | O69–Mo28–<br>O9    | 175.82 | O30–Na1–<br>O118 | 176.04 |
| O85–Mo14–<br>O36  | 104.52 | O69–Mo28–<br>O15   | 99.87  | O118–Na1–<br>O1W | 86.23  |

|                  |        |                  |       |                  |       |
|------------------|--------|------------------|-------|------------------|-------|
| O85–Mo14–<br>O43 | 169.41 | O69–Mo28–<br>O36 | 94.12 | O118–Na1–<br>O2W | 94.28 |
|------------------|--------|------------------|-------|------------------|-------|

Table S6. Selected hydrogen bonding geometry (Å, °) for complex **1**.

| D–H···A             | D–H  | H···A | D···A | D–H···A |
|---------------------|------|-------|-------|---------|
| N2–H2A···O49        | 0.86 | 1.84  | 2.619 | 151     |
| N3–H3A···O125       | 0.86 | 1.91  | 2.753 | 165     |
| N21–H21···O97       | 0.86 | 2.26  | 2.978 | 141     |
| N23–H23···O105      | 0.86 | 2.12  | 2.897 | 149     |
| N32–H32···O93       | 0.86 | 2.25  | 3.050 | 153     |
| N41–H41A···O62      | 0.86 | 2.37  | 3.045 | 135     |
| N42–H42A···O65      | 0.86 | 1.91  | 2.750 | 165     |
| N46–<br>H46A···O119 | 0.86 | 2.36  | 3.08  | 142     |

Table S7. Selected hydrogen bonding geometry (Å, °) for complex **2**.

| D–H···A             | D–H  | H···A | D···A | D–H···A |
|---------------------|------|-------|-------|---------|
| N2–H2A···O131       | 0.86 | 1.81  | 2.670 | 176     |
| N12–H12···O99       | 0.86 | 2.30  | 3.059 | 148     |
| N1–H1···O55         | 0.86 | 1.83  | 2.658 | 162     |
| N4–H4···O56         | 0.86 | 1.95  | 2.805 | 173     |
| N23–H23A···O65      | 0.86 | 1.75  | 2.611 | 175     |
| N24–H24A···O79      | 0.86 | 2.09  | 2.703 | 128     |
| N28–<br>H28A···O145 | 0.86 | 2.19  | 2.909 | 142     |
| N27–H27A···O80      | 0.86 | 2.02  | 2.824 | 154     |

Table S8. BVS values for Mo atoms in complex **1**

| Atom | Mo <sup>V</sup> | Mo <sup>VI</sup> | Average |
|------|-----------------|------------------|---------|
| Mo1  | 5.92            | 6.03             | 5.98    |
| Mo2  | 5.45            | 5.84             | 5.65    |
| Mo3  | 5.91            | 6.02             | 5.97    |
| Mo4  | 5.69            | 5.80             | 5.74    |
| Mo5  | 5.75            | 5.86             | 5.81    |
| Mo6  | 5.78            | 5.89             | 5.83    |
| Mo7  | 5.76            | 5.87             | 5.81    |
| Mo8  | 5.66            | 5.76             | 5.71    |
| Mo9  | 5.92            | 6.04             | 5.98    |
| Mo10 | 5.98            | 6.09             | 6.03    |
| Mo11 | 5.92            | 6.03             | 5.97    |
| Mo12 | 5.87            | 5.98             | 5.92    |
| Mo13 | 5.90            | 6.02             | 5.96    |

|      |      |      |      |
|------|------|------|------|
| Mo14 | 5.90 | 6.01 | 5.96 |
| Mo15 | 5.97 | 6.08 | 6.03 |
| Mo16 | 5.92 | 6.03 | 5.98 |
| Mo17 | 5.95 | 6.06 | 6.00 |
| Mo18 | 5.69 | 5.79 | 5.74 |
| Mo19 | 5.86 | 5.97 | 5.91 |
| Mo20 | 5.87 | 5.99 | 5.93 |
| Mo21 | 5.92 | 6.03 | 5.98 |
| Mo22 | 5.63 | 5.74 | 5.69 |
| Mo23 | 5.97 | 6.09 | 6.03 |
| Mo24 | 5.69 | 5.80 | 5.75 |
| Mo25 | 5.97 | 6.08 | 6.03 |
| Mo26 | 5.99 | 6.10 | 6.04 |
| Mo27 | 6.03 | 6.14 | 6.09 |
| Mo28 | 5.75 | 5.86 | 5.81 |
| Mo29 | 5.86 | 5.97 | 5.91 |
| Mo30 | 5.58 | 5.68 | 5.63 |
| Mo31 | 5.83 | 5.94 | 5.88 |
| Mo32 | 5.95 | 6.06 | 6.01 |
| Mo33 | 5.75 | 5.86 | 5.81 |
| Mo34 | 5.65 | 5.75 | 5.70 |
| Mo35 | 5.78 | 5.89 | 5.84 |
| Mo36 | 5.92 | 6.03 | 5.98 |
|      | 5.83 | 5.95 | 5.89 |

Table S9. BVS values for Mo atoms in complex 2

| Atom | MoV  | MoVI | Average |
|------|------|------|---------|
| Mo1  | 5.63 | 6.09 | 5.86    |
| Mo2  | 5.62 | 6.08 | 5.85    |
| Mo3  | 5.58 | 6.03 | 5.80    |
| Mo4  | 5.47 | 5.92 | 5.70    |
| Mo5  | 5.43 | 5.87 | 5.65    |
| Mo6  | 5.53 | 5.98 | 5.76    |
| Mo7  | 5.45 | 5.89 | 5.67    |
| Mo8  | 5.37 | 5.81 | 5.59    |
| Mo9  | 5.48 | 5.93 | 5.70    |
| Mo10 | 5.58 | 6.04 | 5.81    |
| Mo11 | 5.53 | 5.99 | 5.76    |
| Mo12 | 5.61 | 6.06 | 5.83    |
| Mo13 | 5.62 | 6.07 | 5.84    |
| Mo14 | 5.60 | 6.05 | 5.83    |
| Mo15 | 5.59 | 6.05 | 5.82    |
| Mo16 | 5.58 | 6.03 | 5.80    |
| Mo17 | 5.37 | 5.81 | 5.59    |

|      |      |      |      |
|------|------|------|------|
| Mo18 | 5.45 | 5.90 | 5.67 |
| Mo19 | 5.59 | 6.04 | 5.81 |
| Mo20 | 5.49 | 5.94 | 5.71 |
| Mo21 | 5.41 | 5.85 | 5.63 |
| Mo22 | 5.58 | 6.04 | 5.81 |
| Mo23 | 5.62 | 6.07 | 5.84 |
| Mo24 | 5.59 | 6.05 | 5.82 |
| Mo25 | 5.52 | 5.97 | 5.75 |
| Mo26 | 5.41 | 5.85 | 5.63 |
| Mo27 | 5.58 | 6.04 | 5.81 |
| Mo28 | 5.38 | 5.81 | 5.59 |
| Mo29 | 5.61 | 6.07 | 5.84 |
| Mo30 | 5.62 | 6.07 | 5.85 |
| Mo31 | 5.40 | 5.84 | 5.62 |
| Mo32 | 5.54 | 5.99 | 5.76 |
| Mo33 | 5.42 | 5.86 | 5.64 |
| Mo34 | 5.45 | 5.89 | 5.67 |
| Mo35 | 5.55 | 6.01 | 5.78 |
| Mo36 | 5.47 | 5.92 | 5.70 |
|      | 5.52 | 5.97 | 5.74 |

Table S10. BVS values for Cu atoms in complex **1**

| Atom | BVS  | Atom | BVS  | Atom | BVS  |
|------|------|------|------|------|------|
| Cu1  | 1.85 | Cu4  | 1.01 | Cu7  | 1.01 |
| Cu2  | 1.07 | Cu5  | 1.01 | Cu8  | 1.01 |
| Cu3  | 1.10 | Cu6  | 0.94 | Cu9  | 0.96 |

Table S11. The influence of solvents on the catalytic reaction of BA. <sup>a</sup>

| Entry | Solvent            | Conv.of BA(%) | Sel. of BAD (%) | Sel. of BZA (%) |
|-------|--------------------|---------------|-----------------|-----------------|
| 1     | Diox               | 31.4          | 80.9            | 19.1            |
| 2     | CYH                | 67.9          | 44.1            | 55.9            |
| 3     | CH <sub>3</sub> CN | 70.9          | 31.0            | 69.0            |
| 4     | EtOH               | 38.3          | 68.3            | 31.7            |
| 5     | EtOAc              | 43.0          | 62.5            | 37.5            |

<sup>a</sup> Reaction conditions: 0.5 mmol of BA, catalyst (0.8  $\mu$ mol), TBHP (1.5 mmol), CH<sub>3</sub>CN (1.0 mL), 70 °C, 6 h.

Table S12. The influence of catalyst dosage on the catalytic reaction of BA. <sup>a</sup>

| Entry | Catalyst ( $\mu$ mol) | Conv. of BA(%) | Sel. of BAD (%) | Sel. of BZA (%) |
|-------|-----------------------|----------------|-----------------|-----------------|
| 1     | 0.6                   | 88.7           | 18.6            | 81.4            |
| 2     | 0.8                   | 94.0           | 11.4            | 88.6            |
| 3     | 1.0                   | 96.5           | 7.4             | 92.6            |
| 4     | 1.2                   | 98.5           | 3.3             | 96.7            |
| 5     | 1.4                   | 99.2           | 1.8             | 98.2            |

|   |     |      |     |      |
|---|-----|------|-----|------|
| 6 | 1.6 | 99.6 | 1.8 | 98.2 |
| 7 | 1.8 | 99.6 | 1.3 | 98.7 |
| 8 | 2.0 | 99.5 | 1.4 | 98.6 |

<sup>a</sup> Reaction conditions: 0.5 mmol of BA, TBHP (2 mmol), CH<sub>3</sub>CN (1.0 mL), 75 °C, 8 h.

Table S13. The influence of TBHP dosage on the catalytic reaction of BA. <sup>a</sup>

| Entry | TBHP (mmol) | Conv. of BA(%) | Sel. of BAD (%) | Sel. of BZA (%) |
|-------|-------------|----------------|-----------------|-----------------|
| 1     | 1           | 91.0           | 17.8            | 82.2            |
| 2     | 1.5         | 96.5           | 8.2             | 91.8            |
| 3     | 2           | 99.3           | 1.4             | 98.6            |
| 4     | 2.5         | 98.6           | 3.3             | 96.7            |
| 5     | 3           | 98.4           | 2.1             | 97.9            |

<sup>a</sup> Reaction conditions: 0.5 mmol of BA, catalyst (1.4 μmol), CH<sub>3</sub>CN (1.0 mL), 75 °C, 8 h.

Table S14. The influence of temperature on the catalytic reaction of BA. <sup>a</sup>

| Entry | Temperature (°C) | Conv. of BA(%) | Sel. of BAD (%) | Sel. of BZA (%) |
|-------|------------------|----------------|-----------------|-----------------|
| 1     | 60               | 69.3           | 40.3            | 59.7            |
| 2     | 65               | 81.8           | 25.4            | 74.5            |
| 3     | 70               | 95.8           | 7.8             | 92.2            |
| 4     | 75               | 99.4           | 1.7             | 98.3            |
| 5     | 80               | 99.3           | 1.8             | 98.2            |

<sup>a</sup> Reaction conditions: 0.5 mmol of BA, Catalyst (1.4 μmol), TBHP (2 mmol), CH<sub>3</sub>CN (1.0 mL), 8 h.

Table S15. Catalytic performance of various POM-based catalysts for the oxidation of benzyl alcohol.

| Catalyst                                                         | n <sub>substrate</sub><br>(mmol) | T (°C) | Oxidant                       | Time<br>(h) | Conv.<br>[%] <sup>a</sup> | Sel.<br>[%] <sup>b</sup> | Ref.      |
|------------------------------------------------------------------|----------------------------------|--------|-------------------------------|-------------|---------------------------|--------------------------|-----------|
| Cu <sub>9</sub> [P <sub>6</sub> Mo <sub>18</sub> ] <sub>2</sub>  | 0.5                              | 75     | TBHP                          | 8           | 99.5                      | 98.4                     | This work |
| Cu <sub>9</sub> [P <sub>6</sub> Mo <sub>18</sub> ] <sub>2</sub>  | 5                                | 75     | TBHP                          | 8           | 99.0                      | 99.0                     | This work |
| Na[P <sub>6</sub> Mo <sub>18</sub> ] <sub>2</sub>                | 0.5                              | 75     | TBHP                          | 8           | 67.0                      | 41.2                     | This work |
| Cu <sub>3</sub> [Co <sub>2</sub> Mo <sub>10</sub> ]              | 0.25                             | 75     | TBHP                          | 10          | 99.4                      | 98.8                     | [3]       |
| Cu <sub>2</sub> [Co <sub>2</sub> Mo <sub>10</sub> ]              | 0.25                             | 75     | TBHP                          | 10          | 100                       | 98.0                     | [4]       |
| CuV <sub>2</sub>                                                 | 0.25                             | 120    | H <sub>2</sub> O <sub>2</sub> | 8           | 98.5                      | 100 <sup>c</sup>         | [5]       |
| Cu <sub>12</sub> [P <sub>2</sub> Mo <sub>18</sub> ] <sub>2</sub> | 0.5                              | 70     | TBHP                          | 9           | 100                       | 99.47                    | [6]       |

|                                              |     |     |                        |    |      |                 |      |
|----------------------------------------------|-----|-----|------------------------|----|------|-----------------|------|
| $\text{Cu}_{12}[\text{P}_2\text{Mo}_{18}]_2$ | 5   | 70  | TBHP                   | 9  | 99.6 | 98.2            | [6]  |
| $\text{Cu}_2\text{Mo}_8$                     | 1.1 | 75  | TBHP                   | 24 | 85   | 70              | [7]  |
| PMo/DAIL/MIL-101(Cr)                         | 1   | 100 | TBHP                   | 6  | 56   | 99 <sup>c</sup> | [8]  |
| $\text{NH}_2\text{MIL88B(Fe)-}$              | 1   | 100 | TBHP                   | 8  | 87   | 99 <sup>c</sup> | [9]  |
| $\text{H}_3\text{PMo}_{12}\text{O}_{40}$     | 1   | 100 | TBHP                   | 8  | 87   | 99 <sup>c</sup> | [9]  |
| $\text{MnMo}_8$                              | 4   | 80  | $\text{H}_2\text{O}_2$ | 8  | 97   | 99 <sup>c</sup> | [10] |

[a] Conversion of benzyl alcohol, [b] Selectivity of benzoic acid, [c] Selectivity of benzaldehyde.

## References

- [1] G.M. Sheldrick, A short history of SHELX, *Acta Cryst.* 64 (2007) 112–122. <https://doi.org/10.1107/s0108767307043930>.
- [2] G.M. Sheldrick, SHELXT – Integrated space-group and crystal-structure determination, *Acta Cryst.* 71 (2015) 3–8. <https://doi.org/10.1107/s2053273314026370>.
- [3] F.C. Li, L.K. Tan, X.L. Li, H.J. Kong, L.M. Ge, L.Y. Yue, L.F. Han, Syntheses, structures and catalytic properties of Evans–Showell-type polyoxometalate-based 3D metal–organic complexes constructed from the semi-rigid bis(pyridylformyl)piperazine ligand and transition metals, *Dalton Trans.* 48 (2019) 5831–5841. <https://doi.org/10.1039/c9dt00499h>.
- [4] F.C. Li, X.L. Li, L.K. Tan, J.T. Wang, W.Z. Yao, Evans–Showell-type polyoxometalate-based metal–organic complexes with novel 3D structures constructed from flexible bis-pyrazine–bis-amide ligands and copper metals: syntheses, structures, and fluorescence and catalytic properties, *Dalton Trans.* 48 (2019) 2160–2169. <https://doi.org/10.1039/c8dt04698k>.
- [5] J. Li, X. Huang, S. Yang, Y. Xu, C. Hu, Controllable Synthesis, Characterization, and Catalytic Properties of Three Inorganic–Organic Hybrid Copper Vanadates in the Highly Selective Oxidation of Sulfides and Alcohols, *Cryst. Growth Des.* 15 (2015) 1907–1914. <https://doi.org/10.1021/acs.cgd.5b00086>.
- [6] X. Zhang, N. Xu, X. Liu, Y. Guo, Z. Shang, X. Wang, Scalable synthesis of a new  $\{\text{P}_2\text{Mo}_{18}\text{O}_{62}\}$ -modified  $\text{Cu}^{\text{I}}/\text{Cu}^{\text{II}}$ -based metal–organic complex for multi-center synergistic catalysis of benzyl alcohol to benzoic acid, *Mol. Catal.* 568 (2024). <https://doi.org/10.1016/j.mcat.2024.114478>.
- [7] G.A. Senchyk, A.B. Lysenko, A.A. Babaryk, E.B. Rusanov, H. Krautscheid, P. Neves, A.A. Valente, I.S. Gonçalves, K.W. Krämer, S.-X. Liu, S. Decurtins, K.V. Domasevitch, Triazolyl–Based Copper–Molybdate Hybrids: From Composition Space Diagram to Magnetism and Catalytic Performance, *Inorg. Chem.* 53 (2014) 10112–10121. <https://doi.org/10.1021/ic5009736>.
- [8] S. Abednatanzi, K. Leus, P.G. Derakhshandeh, F. Nahra, K. De Keukeleere, K. Van Hecke, I. Van Driessche, A. Abbasi, S.P. Nolan, P.V. Der Voort, POM@IL-MOFs – inclusion of POMs in

ionic liquid modified MOFs to produce recyclable oxidation catalysts, *Catal. Sci. Technol.* 7 (2017) 1478–1487. <https://doi.org/10.1039/c6cy02662a>.

[9] M. Mohammadikish, M. Panahi, An Fe·MOF–Mo·POM hybrid material: a novel and efficient catalyst for selective benzyl alcohol oxidation to benzaldehyde, *CrystEngComm* 25 (2023) 5470–5478. <https://doi.org/10.1039/d3ce00778b>.

[10] X. Zhang, Y. Yan, L. Wu, C. Yu, X. Dong, H. Hu, G. Xue, A pure inorganic 1D chain based on  $\{\text{Mo}_8\text{O}_{28}\}$  clusters and Mn(II) ions:  $[\text{Mn}(\text{H}_2\text{O})_2\text{Mo}_8\text{O}_{28}]_n^{6n-}$ , *Solid State Sci.* 51 (2016) 18–23. <https://doi.org/10.1016/j.solidstatesciences.2015.11.005>.
